# Supplementary material for: Characterization of Dendritic Cell-Derived Extracellular Vesicles During Dengue Virus Infection
Source: Front Microbiol. 2018 Aug 6;9:1792. doi: 10.3389/fmicb.2018.01792 (PMC6090163; doi:10.3389/fmicb.2018.01792)
Supplement: Supplementary file 1 [file Table_1.XLSX]

## Sheet: Plan1
Feature ID	ANOVA original values - Max difference	ANOVA original values - Max fold change	ANOVA original values - Test statistic	ANOVA original values - P-value	ANOVA original values - FDR p-value correction	ANOVA original values - Bonferroni	ANOVA normalized values - Max difference	ANOVA normalized values - Max fold change	ANOVA normalized values - Test statistic	ANOVA normalized values - P-value	ANOVA normalized values - FDR p-value correction	2 - Normalized means	5 - Normalized means	L - Normalized means	M - Normalized means
hsa-mir-3975 (miRNA)	65	4.42105	1.06525	0.416325	1	1	-16425.1	-1.81914	0.103672	0.955608	1	36476.7	34694.2	29370.3	20051.6
hsa-mir-130b (miRNA)	10.25	3.73333	0.900831	0.481983	1	1	-4374.78	-2.7002	0.282385	0.83683	1	6947.88	6232.66	2573.1	5007.21
hsa-mir-4275 (miRNA)	-0.75	-1.79769e+308	0.401434	0.755955	1	1	-4838.71	-1.79769e+308	0.580345	0.644233	1	4838.71	0	28.3334	177.305
hsa-mir-4720 (miRNA)	0.5	2	0.129032	0.94016	1	1	-1975.7	-35.8652	0.654146	0.60253	1	2032.37	583.09	56.6669	219.974
hsa-mir-4709 (miRNA)	-1.5	-1.79769e+308	0.496496	0.694804	1	1	-1262.63	-1.79769e+308	0.554703	0.659343	1	1262.63	81.0636	0	0
hsa-mir-320a (miRNA)	2.75	4.66667	1.71852	0.240106	0.911547	1	952.871	3.87936	0.536293	0.670386	1	1049.36	330.932	378.305	1283.8
hsa-mir-2909 (miRNA)	7	1.79769e+308	1.86221	0.214309	0.866391	1	2524.94	1.79769e+308	0.692146	0.582094	1	990.625	1431.56	0	2524.94
hsa-mir-4714 (miRNA)	-0.5	-1.79769e+308	0.355556	0.786696	1	1	-838.926	-1.79769e+308	0.492641	0.697208	1	838.926	145.773	0	0
hsa-mir-3974 (miRNA)	2	3.66667	0.44044	0.730409	1	1	-355.882	-1.67155	0.0639469	0.977456	1	631.313	885.824	529.942	709.22
hsa-mir-4538 (miRNA)	-0.75	-1.79769e+308	0.592593	0.637128	1	1	-631.313	-1.79769e+308	0.592593	0.637128	1	631.313	0	0	0
hsa-mir-221 (miRNA)	1	1.79769e+308	0.888889	0.487183	1	1	-420.875	-1.79769e+308	0.541771	0.667083	1	420.875	0	0	354.61
hsa-mir-3676 (miRNA)	0.75	4	0.611111	0.626525	1	1	-273.69	-2.87752	0.154508	0.923862	1	419.463	145.773	264.971	354.61
hsa-mir-1973 (miRNA)	-0.25	-1.79769e+308	0.592593	0.637128	1	1	-419.463	-1.79769e+308	0.592593	0.637128	1	419.463	0	0	0
hsa-mir-3180-5 (miRNA)	-0.25	-1.79769e+308	0.592593	0.637128	1	1	-419.463	-1.79769e+308	0.592593	0.637128	1	419.463	0	0	0
hsa-mir-3690 (miRNA)	-0.25	-1.79769e+308	0.592593	0.637128	1	1	-419.463	-1.79769e+308	0.592593	0.637128	1	419.463	0	0	0
hsa-mir-4689 (miRNA)	-0.25	-1.79769e+308	0.592593	0.637128	1	1	-419.463	-1.79769e+308	0.592593	0.637128	1	419.463	0	0	0
hsa-mir-4732 (miRNA)	-0.25	-1.79769e+308	0.592593	0.637128	1	1	-419.463	-1.79769e+308	0.592593	0.637128	1	419.463	0	0	0
hsa-mir-4454 (miRNA)	-0.75	-1.79769e+308	0.319088	0.811557	1	1	-437.318	-1.79769e+308	0.315054	0.814326	1	303.398	437.318	0	0
hsa-mir-4468 (miRNA)	9.5	20	2.89542	0.101892	0.680765	1	4664.02	29.7676	1.99833	0.192904	0.817361	303.398	162.127	4826.14	439.947
hsa-mir-586 (miRNA)	-0.5	-1.79769e+308	0.355556	0.786696	1	1	-303.398	-1.79769e+308	0.361272	0.782829	1	303.398	145.773	0	0
hsa-mir-1246 (miRNA)	-0.75	-1.79769e+308	0.888889	0.487183	1	1	-297.109	-1.79769e+308	0.554825	0.659271	1	210.438	297.109	0	0
hsa-mir-1537 (miRNA)	-0.25	-1.79769e+308	0.296296	0.827231	1	1	-210.438	-1.79769e+308	0.303353	0.82237	1	210.438	168.805	0	0
hsa-mir-4537 (miRNA)	-0.25	-1.79769e+308	0.296296	0.827231	1	1	-210.438	-1.79769e+308	0.393814	0.761012	1	210.438	81.0636	0	0
hsa-mir-5195 (miRNA)	0.5	1.79769e+308	0.888889	0.487183	1	1	-210.438	-1.79769e+308	0.541771	0.667083	1	210.438	0	0	177.305
hsa-mir-3688-1 (miRNA)	0.5	1.79769e+308	0.888889	0.487183	1	1	264.971	1.79769e+308	0.638101	0.61137	1	210.438	0	264.971	0
hsa-mir-1262 (miRNA)	-0.25	-1.79769e+308	0.592593	0.637128	1	1	-210.438	-1.79769e+308	0.592593	0.637128	1	210.438	0	0	0
hsa-mir-378d-1 (miRNA)	-0.25	-1.79769e+308	0.592593	0.637128	1	1	-210.438	-1.79769e+308	0.592593	0.637128	1	210.438	0	0	0
hsa-mir-486 (miRNA)	-0.25	-1.79769e+308	0.592593	0.637128	1	1	-210.438	-1.79769e+308	0.592593	0.637128	1	210.438	0	0	0
hsa-mir-5196 (miRNA)	-0.25	-1.79769e+308	0.592593	0.637128	1	1	-210.438	-1.79769e+308	0.592593	0.637128	1	210.438	0	0	0
hsa-mir-558 (miRNA)	-0.25	-1.79769e+308	0.592593	0.637128	1	1	-210.438	-1.79769e+308	0.592593	0.637128	1	210.438	0	0	0
hsa-mir-21 (miRNA)	7.75	32	1.40442	0.31073	1	1	2685.18	18.7007	1.54927	0.275452	1	151.699	1136.25	349.971	2836.88
hsa-mir-629 (miRNA)	-1.25	-1.79769e+308	1.2963	0.340578	1	1	-442.324	-1.79769e+308	1.18716	0.37417	1	151.699	442.324	0	177.305
hsa-mir-34a (miRNA)	-0.5	-1.79769e+308	0.493827	0.696468	1	1	-232.957	-1.79769e+308	0.451665	0.723171	1	151.699	232.957	28.3334	0
hsa-mir-4460 (miRNA)	-0.5	-1.79769e+308	0.493827	0.696468	1	1	219.974	1.79769e+308	0.303383	0.822349	1	151.699	209.925	0	219.974
hsa-mir-574 (miRNA)	-0.25	-1.79769e+308	0.296296	0.827231	1	1	-151.699	-1.79769e+308	0.296531	0.827069	1	151.699	145.773	0	0
hsa-mir-3937 (miRNA)	-0.25	-1.79769e+308	0.296296	0.827231	1	1	-151.699	-1.79769e+308	0.380009	0.770225	1	151.699	64.1519	0	0
hsa-mir-1304 (miRNA)	-0.25	-1.79769e+308	0.592593	0.637128	1	1	-151.699	-1.79769e+308	0.592593	0.637128	1	151.699	0	0	0
hsa-mir-4636 (miRNA)	-0.25	-1.79769e+308	0.592593	0.637128	1	1	-151.699	-1.79769e+308	0.592593	0.637128	1	151.699	0	0	0
hsa-mir-4667 (miRNA)	-0.25	-1.79769e+308	0.592593	0.637128	1	1	-151.699	-1.79769e+308	0.592593	0.637128	1	151.699	0	0	0
hsa-mir-4729 (miRNA)	-0.25	-1.79769e+308	0.592593	0.637128	1	1	-151.699	-1.79769e+308	0.592593	0.637128	1	151.699	0	0	0
hsa-mir-4751 (miRNA)	-0.25	-1.79769e+308	0.592593	0.637128	1	1	-151.699	-1.79769e+308	0.592593	0.637128	1	151.699	0	0	0
hsa-mir-4780 (miRNA)	-0.25	-1.79769e+308	0.592593	0.637128	1	1	-151.699	-1.79769e+308	0.592593	0.637128	1	151.699	0	0	0
hsa-mir-498 (miRNA)	-0.25	-1.79769e+308	0.592593	0.637128	1	1	-151.699	-1.79769e+308	0.592593	0.637128	1	151.699	0	0	0
hsa-mir-548o (miRNA)	-0.25	-1.79769e+308	0.592593	0.637128	1	1	-151.699	-1.79769e+308	0.592593	0.637128	1	151.699	0	0	0
hsa-mir-551a (miRNA)	-0.25	-1.79769e+308	0.592593	0.637128	1	1	-151.699	-1.79769e+308	0.592593	0.637128	1	151.699	0	0	0
hsa-mir-608 (miRNA)	-0.25	-1.79769e+308	0.592593	0.637128	1	1	-151.699	-1.79769e+308	0.592593	0.637128	1	151.699	0	0	0
hsa-mir-4448 (miRNA)	1.5	1.79769e+308	2.62626	0.122231	0.680765	1	523.388	1.79769e+308	4.02925	0.051046	0.697869	0	523.388	0	177.305
hsa-mir-1282 (miRNA)	1	1.79769e+308	1.77778	0.229037	0.877345	1	290.431	1.79769e+308	1.73083	0.237755	0.973498	0	290.431	0	0
hsa-mir-4505 (miRNA)	1	1.79769e+308	0.592593	0.637128	1	1	256.608	1.79769e+308	0.592593	0.637128	1	0	256.608	0	0
hsa-mir-1261 (miRNA)	0.5	1.79769e+308	1.33333	0.329989	1	1	249.868	1.79769e+308	1.34973	0.325424	1	0	249.868	28.3334	0
hsa-mir-5697 (miRNA)	0.5	1.79769e+308	1.77778	0.229037	0.877345	1	249.868	1.79769e+308	1.42609	0.305125	1	0	249.868	0	0
hsa-let-7d (miRNA)	0.5	1.79769e+308	1.77778	0.229037	0.877345	1	232.957	1.79769e+308	1.26656	0.34937	1	0	232.957	0	0
hsa-mir-3149 (miRNA)	0.5	1.79769e+308	1.33333	0.329989	1	1	264.971	1.79769e+308	1.22252	0.362881	1	0	226.836	264.971	0
hsa-mir-1182 (miRNA)	0.5	1.79769e+308	1.77778	0.229037	0.877345	1	209.925	1.79769e+308	1.36506	0.321225	1	0	209.925	0	0
hsa-mir-219-2 (miRNA)	0.25	1.79769e+308	0.592593	0.637128	1	1	168.805	1.79769e+308	0.592593	0.637128	1	0	168.805	0	0
hsa-mir-3658 (miRNA)	0.25	1.79769e+308	0.592593	0.637128	1	1	168.805	1.79769e+308	0.592593	0.637128	1	0	168.805	0	0
hsa-mir-3688-2 (miRNA)	0.25	1.79769e+308	0.592593	0.637128	1	1	168.805	1.79769e+308	0.592593	0.637128	1	0	168.805	0	0
hsa-mir-432 (miRNA)	0.25	1.79769e+308	0.592593	0.637128	1	1	168.805	1.79769e+308	0.592593	0.637128	1	0	168.805	0	0
hsa-mir-4426 (miRNA)	0.25	1.79769e+308	0.592593	0.637128	1	1	168.805	1.79769e+308	0.592593	0.637128	1	0	168.805	0	0
hsa-mir-4512 (miRNA)	0.25	1.79769e+308	0.592593	0.637128	1	1	168.805	1.79769e+308	0.592593	0.637128	1	0	168.805	0	0
hsa-mir-4528 (miRNA)	0.25	1.79769e+308	0.592593	0.637128	1	1	168.805	1.79769e+308	0.592593	0.637128	1	0	168.805	0	0
hsa-mir-4791 (miRNA)	0.25	1.79769e+308	0.592593	0.637128	1	1	168.805	1.79769e+308	0.592593	0.637128	1	0	168.805	0	0
hsa-mir-150 (miRNA)	1.5	1.79769e+308	2	0.192657	0.791382	1	574.584	1.79769e+308	3.62687	0.0644077	0.697869	0	162.127	28.3334	574.584
hsa-mir-451a (miRNA)	0.5	1.79769e+308	0.592593	0.637128	1	1	162.127	1.79769e+308	0.592593	0.637128	1	0	162.127	0	0
hsa-mir-106a (miRNA)	0.25	1.79769e+308	0.592593	0.637128	1	1	145.773	1.79769e+308	0.592593	0.637128	1	0	145.773	0	0
hsa-mir-125a (miRNA)	0.25	1.79769e+308	0.592593	0.637128	1	1	145.773	1.79769e+308	0.592593	0.637128	1	0	145.773	0	0
hsa-mir-146b (miRNA)	0.25	1.79769e+308	0.592593	0.637128	1	1	145.773	1.79769e+308	0.592593	0.637128	1	0	145.773	0	0
hsa-mir-3193 (miRNA)	0.25	1.79769e+308	0.592593	0.637128	1	1	145.773	1.79769e+308	0.592593	0.637128	1	0	145.773	0	0
hsa-mir-3613 (miRNA)	0.25	1.79769e+308	0.592593	0.637128	1	1	145.773	1.79769e+308	0.592593	0.637128	1	0	145.773	0	0
hsa-mir-3674 (miRNA)	0.25	1.79769e+308	0.592593	0.637128	1	1	145.773	1.79769e+308	0.592593	0.637128	1	0	145.773	0	0
hsa-mir-3685 (miRNA)	0.25	1.79769e+308	0.592593	0.637128	1	1	145.773	1.79769e+308	0.592593	0.637128	1	0	145.773	0	0
hsa-mir-3960 (miRNA)	0.25	1.79769e+308	0.592593	0.637128	1	1	145.773	1.79769e+308	0.592593	0.637128	1	0	145.773	0	0
hsa-mir-4672 (miRNA)	0.25	1.79769e+308	0.592593	0.637128	1	1	145.773	1.79769e+308	0.592593	0.637128	1	0	145.773	0	0
hsa-mir-5681a (miRNA)	0.25	1.79769e+308	0.592593	0.637128	1	1	145.773	1.79769e+308	0.592593	0.637128	1	0	145.773	0	0
hsa-mir-619 (miRNA)	0.25	1.79769e+308	0.592593	0.637128	1	1	145.773	1.79769e+308	0.592593	0.637128	1	0	145.773	0	0
hsa-mir-3168 (miRNA)	0.5	1.79769e+308	1.33333	0.329989	1	1	264.971	1.79769e+308	1.43219	0.303569	1	0	145.215	264.971	0
hsa-mir-3944 (miRNA)	0.5	1.79769e+308	0.888889	0.487183	1	1	177.305	1.79769e+308	0.954956	0.45917	1	0	81.0636	0	177.305
hsa-mir-5191 (miRNA)	0.5	1.79769e+308	0.888889	0.487183	1	1	177.305	1.79769e+308	0.954956	0.45917	1	0	81.0636	0	177.305
hsa-mir-1245b (miRNA)	0.25	1.79769e+308	0.592593	0.637128	1	1	81.0636	1.79769e+308	0.592593	0.637128	1	0	81.0636	0	0
hsa-mir-1255b-1 (miRNA)	0.25	1.79769e+308	0.592593	0.637128	1	1	81.0636	1.79769e+308	0.592593	0.637128	1	0	81.0636	0	0
hsa-mir-1302-6 (miRNA)	0.25	1.79769e+308	0.592593	0.637128	1	1	81.0636	1.79769e+308	0.592593	0.637128	1	0	81.0636	0	0
hsa-mir-142 (miRNA)	0.25	1.79769e+308	0.592593	0.637128	1	1	81.0636	1.79769e+308	0.592593	0.637128	1	0	81.0636	0	0
hsa-mir-3160-1 (miRNA)	0.25	1.79769e+308	0.592593	0.637128	1	1	81.0636	1.79769e+308	0.592593	0.637128	1	0	81.0636	0	0
hsa-mir-328 (miRNA)	0.25	1.79769e+308	0.592593	0.637128	1	1	81.0636	1.79769e+308	0.592593	0.637128	1	0	81.0636	0	0
hsa-mir-3649 (miRNA)	0.25	1.79769e+308	0.592593	0.637128	1	1	81.0636	1.79769e+308	0.592593	0.637128	1	0	81.0636	0	0
hsa-mir-3653 (miRNA)	0.25	1.79769e+308	0.592593	0.637128	1	1	81.0636	1.79769e+308	0.592593	0.637128	1	0	81.0636	0	0
hsa-mir-3935 (miRNA)	0.25	1.79769e+308	0.592593	0.637128	1	1	81.0636	1.79769e+308	0.592593	0.637128	1	0	81.0636	0	0
hsa-mir-3941 (miRNA)	0.25	1.79769e+308	0.592593	0.637128	1	1	81.0636	1.79769e+308	0.592593	0.637128	1	0	81.0636	0	0
hsa-mir-4252 (miRNA)	0.25	1.79769e+308	0.592593	0.637128	1	1	81.0636	1.79769e+308	0.592593	0.637128	1	0	81.0636	0	0
hsa-mir-429 (miRNA)	0.25	1.79769e+308	0.592593	0.637128	1	1	81.0636	1.79769e+308	0.592593	0.637128	1	0	81.0636	0	0
hsa-mir-4316 (miRNA)	0.25	1.79769e+308	0.592593	0.637128	1	1	81.0636	1.79769e+308	0.592593	0.637128	1	0	81.0636	0	0
hsa-mir-4710 (miRNA)	0.25	1.79769e+308	0.592593	0.637128	1	1	81.0636	1.79769e+308	0.592593	0.637128	1	0	81.0636	0	0
hsa-mir-607 (miRNA)	0.25	1.79769e+308	0.592593	0.637128	1	1	81.0636	1.79769e+308	0.592593	0.637128	1	0	81.0636	0	0
hsa-mir-184 (miRNA)	0.5	1.79769e+308	0.888889	0.487183	1	1	177.305	1.79769e+308	1.14505	0.38815	1	0	64.1519	0	177.305
hsa-mir-1267 (miRNA)	0.5	1.79769e+308	0.888889	0.487183	1	1	264.971	1.79769e+308	1.47978	0.291746	1	0	64.1519	264.971	0
hsa-let-7e (miRNA)	0.25	1.79769e+308	0.592593	0.637128	1	1	64.1519	1.79769e+308	0.592593	0.637128	1	0	64.1519	0	0
hsa-mir-1179 (miRNA)	0.25	1.79769e+308	0.592593	0.637128	1	1	64.1519	1.79769e+308	0.592593	0.637128	1	0	64.1519	0	0
hsa-mir-1233-1 (miRNA)	0.25	1.79769e+308	0.592593	0.637128	1	1	64.1519	1.79769e+308	0.592593	0.637128	1	0	64.1519	0	0
hsa-mir-3134 (miRNA)	0.25	1.79769e+308	0.592593	0.637128	1	1	64.1519	1.79769e+308	0.592593	0.637128	1	0	64.1519	0	0
hsa-mir-3198-1 (miRNA)	0.25	1.79769e+308	0.592593	0.637128	1	1	64.1519	1.79769e+308	0.592593	0.637128	1	0	64.1519	0	0
hsa-mir-371b (miRNA)	0.25	1.79769e+308	0.592593	0.637128	1	1	64.1519	1.79769e+308	0.592593	0.637128	1	0	64.1519	0	0
hsa-mir-421 (miRNA)	0.25	1.79769e+308	0.592593	0.637128	1	1	64.1519	1.79769e+308	0.592593	0.637128	1	0	64.1519	0	0
hsa-mir-4327 (miRNA)	0.25	1.79769e+308	0.592593	0.637128	1	1	64.1519	1.79769e+308	0.592593	0.637128	1	0	64.1519	0	0
hsa-mir-448 (miRNA)	0.25	1.79769e+308	0.592593	0.637128	1	1	64.1519	1.79769e+308	0.592593	0.637128	1	0	64.1519	0	0
hsa-mir-4699 (miRNA)	0.25	1.79769e+308	0.592593	0.637128	1	1	64.1519	1.79769e+308	0.592593	0.637128	1	0	64.1519	0	0
hsa-mir-505 (miRNA)	0.25	1.79769e+308	0.592593	0.637128	1	1	64.1519	1.79769e+308	0.592593	0.637128	1	0	64.1519	0	0
hsa-mir-548l (miRNA)	0.25	1.79769e+308	0.592593	0.637128	1	1	64.1519	1.79769e+308	0.592593	0.637128	1	0	64.1519	0	0
hsa-mir-3147 (miRNA)	4.5	1.79769e+308	2.22222	0.163064	0.680765	1	1595.74	1.79769e+308	2.22222	0.163064	0.697869	0	0	0	1595.74
hsa-mir-4696 (miRNA)	2	1.79769e+308	2.22222	0.163064	0.680765	1	709.22	1.79769e+308	2.22222	0.163064	0.697869	0	0	0	709.22
hsa-mir-5686 (miRNA)	1	1.79769e+308	2.22222	0.163064	0.680765	1	439.947	1.79769e+308	2.22222	0.163064	0.697869	0	0	0	439.947
hsa-mir-548g (miRNA)	1	1.79769e+308	2.22222	0.163064	0.680765	1	354.61	1.79769e+308	2.22222	0.163064	0.697869	0	0	0	354.61
hsa-mir-1268a (miRNA)	0.5	1.79769e+308	2.22222	0.163064	0.680765	1	219.974	1.79769e+308	2.22222	0.163064	0.697869	0	0	0	219.974
hsa-mir-3145 (miRNA)	0.5	1.79769e+308	2.22222	0.163064	0.680765	1	219.974	1.79769e+308	2.22222	0.163064	0.697869	0	0	0	219.974
hsa-mir-3659 (miRNA)	0.5	1.79769e+308	2.22222	0.163064	0.680765	1	219.974	1.79769e+308	2.22222	0.163064	0.697869	0	0	0	219.974
hsa-mir-3689a (miRNA)	0.5	1.79769e+308	2.22222	0.163064	0.680765	1	219.974	1.79769e+308	2.22222	0.163064	0.697869	0	0	0	219.974
hsa-mir-4467 (miRNA)	0.5	1.79769e+308	2.22222	0.163064	0.680765	1	219.974	1.79769e+308	2.22222	0.163064	0.697869	0	0	0	219.974
hsa-mir-4473 (miRNA)	0.5	1.79769e+308	2.22222	0.163064	0.680765	1	219.974	1.79769e+308	2.22222	0.163064	0.697869	0	0	0	219.974
hsa-mir-4659a (miRNA)	0.5	1.79769e+308	2.22222	0.163064	0.680765	1	219.974	1.79769e+308	2.22222	0.163064	0.697869	0	0	0	219.974
hsa-mir-548n (miRNA)	0.5	1.79769e+308	2.22222	0.163064	0.680765	1	219.974	1.79769e+308	2.22222	0.163064	0.697869	0	0	0	219.974
hsa-mir-5706 (miRNA)	0.5	1.79769e+308	2.22222	0.163064	0.680765	1	219.974	1.79769e+308	2.22222	0.163064	0.697869	0	0	0	219.974
hsa-mir-649 (miRNA)	0.5	1.79769e+308	2.22222	0.163064	0.680765	1	219.974	1.79769e+308	2.22222	0.163064	0.697869	0	0	0	219.974
hsa-mir-1252 (miRNA)	0.5	1.79769e+308	2.22222	0.163064	0.680765	1	177.305	1.79769e+308	2.22222	0.163064	0.697869	0	0	0	177.305
hsa-mir-1913 (miRNA)	0.5	1.79769e+308	2.22222	0.163064	0.680765	1	177.305	1.79769e+308	2.22222	0.163064	0.697869	0	0	0	177.305
hsa-mir-3159 (miRNA)	0.5	1.79769e+308	2.22222	0.163064	0.680765	1	177.305	1.79769e+308	2.22222	0.163064	0.697869	0	0	0	177.305
hsa-mir-3609 (miRNA)	0.5	1.79769e+308	2.22222	0.163064	0.680765	1	177.305	1.79769e+308	2.22222	0.163064	0.697869	0	0	0	177.305
hsa-mir-378c (miRNA)	0.5	1.79769e+308	2.22222	0.163064	0.680765	1	177.305	1.79769e+308	2.22222	0.163064	0.697869	0	0	0	177.305
hsa-mir-3926-1 (miRNA)	0.5	1.79769e+308	2.22222	0.163064	0.680765	1	177.305	1.79769e+308	2.22222	0.163064	0.697869	0	0	0	177.305
hsa-mir-409 (miRNA)	0.5	1.79769e+308	2.22222	0.163064	0.680765	1	177.305	1.79769e+308	2.22222	0.163064	0.697869	0	0	0	177.305
hsa-mir-4483 (miRNA)	0.5	1.79769e+308	2.22222	0.163064	0.680765	1	177.305	1.79769e+308	2.22222	0.163064	0.697869	0	0	0	177.305
hsa-mir-450a-1 (miRNA)	0.5	1.79769e+308	2.22222	0.163064	0.680765	1	177.305	1.79769e+308	2.22222	0.163064	0.697869	0	0	0	177.305
hsa-mir-5001 (miRNA)	0.5	1.79769e+308	2.22222	0.163064	0.680765	1	177.305	1.79769e+308	2.22222	0.163064	0.697869	0	0	0	177.305
hsa-mir-7-2 (miRNA)	0.5	1.79769e+308	2.22222	0.163064	0.680765	1	177.305	1.79769e+308	2.22222	0.163064	0.697869	0	0	0	177.305
hsa-mir-760 (miRNA)	0.5	1.79769e+308	2.22222	0.163064	0.680765	1	177.305	1.79769e+308	2.22222	0.163064	0.697869	0	0	0	177.305
hsa-mir-1302-4 (miRNA)	0.5	1.79769e+308	2.22222	0.163064	0.680765	1	264.971	1.79769e+308	2.22222	0.163064	0.697869	0	0	264.971	0
hsa-mir-217 (miRNA)	0.5	1.79769e+308	2.22222	0.163064	0.680765	1	264.971	1.79769e+308	2.22222	0.163064	0.697869	0	0	264.971	0
hsa-mir-23a (miRNA)	0.5	1.79769e+308	2.22222	0.163064	0.680765	1	264.971	1.79769e+308	2.22222	0.163064	0.697869	0	0	264.971	0
hsa-mir-30d (miRNA)	0.5	1.79769e+308	2.22222	0.163064	0.680765	1	264.971	1.79769e+308	2.22222	0.163064	0.697869	0	0	264.971	0
hsa-mir-3124 (miRNA)	0.5	1.79769e+308	2.22222	0.163064	0.680765	1	264.971	1.79769e+308	2.22222	0.163064	0.697869	0	0	264.971	0
hsa-mir-3622a (miRNA)	0.5	1.79769e+308	2.22222	0.163064	0.680765	1	264.971	1.79769e+308	2.22222	0.163064	0.697869	0	0	264.971	0
hsa-mir-4265 (miRNA)	0.5	1.79769e+308	2.22222	0.163064	0.680765	1	264.971	1.79769e+308	2.22222	0.163064	0.697869	0	0	264.971	0
hsa-mir-4444-2 (miRNA)	0.5	1.79769e+308	2.22222	0.163064	0.680765	1	264.971	1.79769e+308	2.22222	0.163064	0.697869	0	0	264.971	0
hsa-mir-466 (miRNA)	0.5	1.79769e+308	2.22222	0.163064	0.680765	1	264.971	1.79769e+308	2.22222	0.163064	0.697869	0	0	264.971	0
hsa-mir-581 (miRNA)	0.5	1.79769e+308	2.22222	0.163064	0.680765	1	264.971	1.79769e+308	2.22222	0.163064	0.697869	0	0	264.971	0
hsa-mir-29a (miRNA)	0.5	1.79769e+308	2.22222	0.163064	0.680765	1	28.3334	1.79769e+308	2.22222	0.163064	0.697869	0	0	28.3334	0
hsa-mir-3142 (miRNA)	0.5	1.79769e+308	2.22222	0.163064	0.680765	1	28.3334	1.79769e+308	2.22222	0.163064	0.697869	0	0	28.3334	0
hsa-mir-3591 (miRNA)	0.5	1.79769e+308	2.22222	0.163064	0.680765	1	28.3334	1.79769e+308	2.22222	0.163064	0.697869	0	0	28.3334	0
hsa-mir-365a (miRNA)	0.5	1.79769e+308	2.22222	0.163064	0.680765	1	28.3334	1.79769e+308	2.22222	0.163064	0.697869	0	0	28.3334	0
hsa-mir-3661 (miRNA)	0.5	1.79769e+308	2.22222	0.163064	0.680765	1	28.3334	1.79769e+308	2.22222	0.163064	0.697869	0	0	28.3334	0
hsa-mir-3672 (miRNA)	0.5	1.79769e+308	2.22222	0.163064	0.680765	1	28.3334	1.79769e+308	2.22222	0.163064	0.697869	0	0	28.3334	0
hsa-mir-4269 (miRNA)	0.5	1.79769e+308	2.22222	0.163064	0.680765	1	28.3334	1.79769e+308	2.22222	0.163064	0.697869	0	0	28.3334	0
hsa-mir-4330 (miRNA)	0.5	1.79769e+308	2.22222	0.163064	0.680765	1	28.3334	1.79769e+308	2.22222	0.163064	0.697869	0	0	28.3334	0
hsa-mir-4478 (miRNA)	0.5	1.79769e+308	2.22222	0.163064	0.680765	1	28.3334	1.79769e+308	2.22222	0.163064	0.697869	0	0	28.3334	0
hsa-mir-4783 (miRNA)	0.5	1.79769e+308	2.22222	0.163064	0.680765	1	28.3334	1.79769e+308	2.22222	0.163064	0.697869	0	0	28.3334	0
hsa-mir-5010 (miRNA)	0.5	1.79769e+308	2.22222	0.163064	0.680765	1	28.3334	1.79769e+308	2.22222	0.163064	0.697869	0	0	28.3334	0
hsa-mir-5693 (miRNA)	0.5	1.79769e+308	2.22222	0.163064	0.680765	1	28.3334	1.79769e+308	2.22222	0.163064	0.697869	0	0	28.3334	0
hsa-mir-663b (miRNA)	0.5	1.79769e+308	2.22222	0.163064	0.680765	1	28.3334	1.79769e+308	2.22222	0.163064	0.697869	0	0	28.3334	0
hsa-mir-3195 (miRNA)	1	1.79769e+308	2.22222	0.163064	0.680765	1	56.6669	1.79769e+308	2.22222	0.163064	0.697869	0	0	56.6669	0
hsa-mir-3976 (miRNA)	1	1.79769e+308	2.22222	0.163064	0.680765	1	56.6669	1.79769e+308	2.22222	0.163064	0.697869	0	0	56.6669	0
