# Supplementary material for: Characterization of Dendritic Cell-Derived Extracellular Vesicles During Dengue Virus Infection
Source: Front Microbiol. 2018 Aug 6;9:1792. doi: 10.3389/fmicb.2018.01792 (PMC6090163; doi:10.3389/fmicb.2018.01792)
Supplement: Supplementary file 3 [file Table_3.XLSX]

## Sheet: Plan1
Gene	290 vs 5532 Fold change	290 vs 5532 - p-value corrected FDR	Normalized expression means Mock	Normalized expression means DENV3 290	Normalized expression means DENV3 5532
RPL27	1.79769e+308	0	0	0	180.727
TRIM49 (NW_001838030 675..4268)	1.79769e+308	1.85682e-14	0	0	169.571
C5orf58	1.79769e+308	0	0	0	145.881
RPS13	1.79769e+308	0	0	0	131.1
HIST1H3G	1.79769e+308	1.02594e-13	0	0	127.451
RPS15A	1.79769e+308	3.42262e-14	0	0	109.612
LOC284804	1.79769e+308	0	0	0	101.569
LOC100505676	1.79769e+308	3.42262e-14	0	0	98.7678
GSTT1	1.79769e+308	0	0	0	98.2634
HIST1H3J	1.79769e+308	0	0	0	93.3884
S100A2	1.79769e+308	0	0	0	92.7095
AGAP4	1.79769e+308	0	0	0	92.4216
HIST1H4E	1.79769e+308	3.42262e-14	0	0	78.9384
CCDC153	1.79769e+308	8.36573e-14	0	0	77.6004
CLEC4G	1.79769e+308	1.12988e-13	0	0	76.5876
THRSP	1.79769e+308	0	0	0	75.6604
RSPH10B (NW_001838999 1246..1649)	1.79769e+308	1.02594e-13	0	0	73.8456
TMEM80	1.79769e+308	0	0	0	73.3451
COX7C	1.79769e+308	0	0	0	73.1198
PAIP2	1.79769e+308	6.08019e-14	0	0	71.7968
MT2A	1.79769e+308	7.3481e-14	0	0	71.0257
TMSB4X	1.79769e+308	2.698e-14	0	0	70.9692
ABCB6	1.79769e+308	9.33202e-14	0	0	69.0253
ATP5E	1.79769e+308	6.72808e-14	0	0	67.7899
PFDN5	1.79769e+308	3.42262e-14	0	0	64.9776
CYBA	1.79769e+308	6.08019e-14	0	0	64.8832
PEX10	1.79769e+308	0	0	0	64.5704
EFCAB11	1.79769e+308	1.85682e-14	0	0	64.2297
C5orf52	1.79769e+308	1.85682e-14	0	0	64.0454
HIST1H3F	1.79769e+308	7.84496e-14	0	0	63.8622
AHSA1	1.79769e+308	5.49248e-14	0	0	63.7709
GPR114	1.79769e+308	3.42262e-14	0	0	63.3018
LOC392288	1.79769e+308	7.84496e-14	0	0	62.7843
GTF3C6	1.79769e+308	1.24434e-13	0	0	62.6521
HIST1H3I	1.79769e+308	1.02594e-13	0	0	62.3894
HAT1	1.79769e+308	8.81707e-14	0	0	62.3708
DEFB107B	1.79769e+308	1.02594e-13	0	0	61.9995
ATP5J	1.79769e+308	1.18689e-13	0	0	61.8963
TFAM	1.79769e+308	1.47078e-13	0	0	61.4871
PSMA6	1.79769e+308	5.22863e-13	0	0	58.4671
OCIAD2	1.79769e+308	4.77395e-13	0	0	58.4289
TMED4	1.79769e+308	5.83274e-13	0	0	58.2383
HBD	1.79769e+308	7.72094e-13	0	0	57.674
DPM1	1.79769e+308	1.11041e-12	0	0	56.8477
MAGI1	1.79769e+308	1.55249e-12	0	0	56.1131
NOP10	1.79769e+308	1.96979e-12	0	0	55.6257
TCEAL4	1.79769e+308	2.47991e-12	0	0	55.2334
UNC119	1.79769e+308	4.31283e-12	0	0	54.0759
AKR1B1	1.79769e+308	6.67269e-12	0	0	53.1804
C6orf115	1.79769e+308	7.96596e-12	0	0	52.828
TPX2	1.79769e+308	8.01421e-12	0	0	52.8232
RERGL	1.79769e+308	9.38963e-12	0	0	52.4864
C9orf135	1.79769e+308	9.53232e-12	0	0	52.4555
NOTCH2NL	1.79769e+308	9.85773e-12	0	0	52.3939
ADIPOR1	1.79769e+308	1.37085e-11	0	0	51.7336
ISCU	1.79769e+308	2.22918e-11	0	0	50.7413
MYL12B	1.79769e+308	2.48241e-11	0	0	50.5259
PYROXD2	1.79769e+308	2.59063e-11	0	0	50.4403
GATSL1	1.79769e+308	3.23281e-11	0	0	49.9884
SCXA	1.79769e+308	4.60318e-11	0	0	49.2711
UBE2T	1.79769e+308	4.84996e-11	0	0	49.1626
HYDIN (NW_001838312 1768..2332)	1.79769e+308	5.85472e-11	0	0	48.7865
CHI3L1	1.79769e+308	6.38139e-11	0	0	48.6006
RRP9	1.79769e+308	7.70735e-11	0	0	48.2174
CDH13	1.79769e+308	8.16695e-11	0	0	48.0994
CNIH4	1.79769e+308	8.25444e-11	0	0	48.0772
TAGLN	1.79769e+308	9.55337e-11	0	0	47.7838
FGF10	1.79769e+308	1.11977e-10	0	0	47.4637
SSBP1	1.79769e+308	1.16266e-10	0	0	47.3882
LOC100128326	1.79769e+308	1.72916e-10	0	0	46.5724
KLHDC4	1.79769e+308	2.01468e-10	0	0	46.2587
RELA	1.79769e+308	2.09871e-10	0	0	46.175
REL	1.79769e+308	2.37201e-10	0	0	45.9256
MRPL18	1.79769e+308	2.6594e-10	0	0	45.6905
TMEM66	1.79769e+308	3.44732e-10	0	0	45.159
STARD6	1.79769e+308	3.94479e-10	0	0	44.8865
TOP1MT (NW_001841166 970..1834)	1.79769e+308	6.89334e-10	0	0	43.7644
TCEAL2	1.79769e+308	8.58004e-10	0	0	43.3184
EXOSC7	1.79769e+308	9.58405e-10	0	0	43.0885
LOC100509620	1.79769e+308	1.06316e-09	0	0	42.8815
IFIT2	1.79769e+308	1.23459e-09	0	0	42.5748
RGS1	1.79769e+308	1.3307e-09	0	0	42.423
C15orf24	1.79769e+308	1.37735e-09	0	0	42.3526
C20orf173	1.79769e+308	1.52104e-09	0	0	42.1526
NDUFB5	1.79769e+308	1.52104e-09	0	0	42.1526
C9orf16	1.79769e+308	1.86593e-09	0	0	41.7388
PSME1	1.79769e+308	2.0343e-09	0	0	41.5639
RPL10A	1.79769e+308	2.2151e-09	0	0	41.3905
RPL4	1.79769e+308	2.30789e-09	0	0	41.3043
NBPF4 (NW_001838590 520..10390)	1.79769e+308	2.4029e-09	0	0	41.2185
YWHAQ	1.79769e+308	2.4029e-09	0	0	41.2185
SPCS1	1.79769e+308	2.4931e-09	0	0	41.1425
RSPH3	1.79769e+308	2.65699e-09	0	0	41.0102
LOC100509638	1.79769e+308	2.68137e-09	0	0	40.9914
ATP5I	1.79769e+308	2.99742e-09	0	0	40.7668
SPINK6	1.79769e+308	3.25321e-09	0	0	40.6
SPINK4	1.79769e+308	3.53543e-09	0	0	40.4345
KRTAP25-1	1.79769e+308	3.92657e-09	0	0	40.2159
PNLIPRP1	1.79769e+308	3.92657e-09	0	0	40.2159
ING2	1.79769e+308	4.36888e-09	0	0	39.9997
AGR3	1.79769e+308	5.10386e-09	0	0	39.6797
DCTN6	1.79769e+308	5.18918e-09	0	0	39.6444
DEDD2	1.79769e+308	5.77122e-09	0	0	39.4273
EDF1	1.79769e+308	7.49269e-09	0	0	38.9017
IRF5	1.79769e+308	7.9569e-09	0	0	38.7749
SDHB	1.79769e+308	8.18871e-09	0	0	38.7161
CCL18	1.79769e+308	8.46267e-09	0	0	38.649
AP2M1	1.79769e+308	9.79279e-09	0	0	38.3502
CWC25	1.79769e+308	9.94993e-09	0	0	38.3173
C1orf38	1.79769e+308	1.02021e-08	0	0	38.2657
HIST1H4C	1.79769e+308	1.07851e-08	0	0	38.1535
HINT1	1.79769e+308	1.13115e-08	0	0	38.056
CDKL1	1.79769e+308	1.20584e-08	0	0	37.9266
NPHP1	1.79769e+308	1.24334e-08	0	0	37.8623
BBC3	1.79769e+308	1.36725e-08	0	0	37.6706
HYDIN (NW_001838304 3746..4359)	1.79769e+308	1.36725e-08	0	0	37.6706
C6orf108	1.79769e+308	1.61173e-08	0	0	37.3397
IL2	1.79769e+308	1.68929e-08	0	0	37.2463
MDK	1.79769e+308	1.78176e-08	0	0	37.1378
TNP1	1.79769e+308	1.89181e-08	0	0	37.0146
CCL7	1.79769e+308	1.93338e-08	0	0	36.9687
KRT27	1.79769e+308	1.97757e-08	0	0	36.9228
RHOC	1.79769e+308	2.1918e-08	0	0	36.7178
CADPS2	1.79769e+308	2.27328e-08	0	0	36.6439
CLIC3	1.79769e+308	2.31717e-08	0	0	36.6049
MRPS33	1.79769e+308	2.53219e-08	0	0	36.4257
CYB5R1	1.79769e+308	2.7975e-08	0	0	36.2261
KCTD15	1.79769e+308	2.7975e-08	0	0	36.2261
LOC100652970	1.79769e+308	3.36426e-08	0	0	35.8551
PSMD7	1.79769e+308	3.72918e-08	0	0	35.6404
SQRDL	1.79769e+308	3.80827e-08	0	0	35.5978
CCL20	1.79769e+308	4.30506e-08	0	0	35.3441
C4orf51	1.79769e+308	4.6741e-08	0	0	35.177
DPP7	1.79769e+308	4.6741e-08	0	0	35.177
CXCL17	1.79769e+308	5.37325e-08	0	0	34.8884
STAT6	1.79769e+308	5.41619e-08	0	0	34.872
SCGBL	1.79769e+308	5.48236e-08	0	0	34.8475
DLL4	1.79769e+308	5.59095e-08	0	0	34.8067
BLVRB	1.79769e+308	5.69893e-08	0	0	34.7661
PPM1J	1.79769e+308	5.81127e-08	0	0	34.7255
PSMD14	1.79769e+308	5.86689e-08	0	0	34.7053
ST6GALNAC4	1.79769e+308	6.48542e-08	0	0	34.4974
NR2C2AP	1.79769e+308	6.92222e-08	0	0	34.3646
MANBAL	1.79769e+308	8.50768e-08	0	0	33.9465
LRRC3C	1.79769e+308	8.72486e-08	0	0	33.8949
LY6G6C	1.79769e+308	9.05004e-08	0	0	33.8179
RLN2	1.79769e+308	1.07137e-07	0	0	33.4755
THOC4	1.79769e+308	1.17664e-07	0	0	33.2883
PEBP4	1.79769e+308	1.19783e-07	0	0	33.2511
HIST2H2AB	1.79769e+308	1.21833e-07	0	0	33.214
LOC100131035	1.79769e+308	1.21833e-07	0	0	33.214
HSPA14	1.79769e+308	1.38092e-07	0	0	32.9565
XAGE3	1.79769e+308	1.50971e-07	0	0	32.7751
COX7B	1.79769e+308	1.61412e-07	0	0	32.6313
OR10A2	1.79769e+308	1.61412e-07	0	0	32.6313
PTPMT1	1.79769e+308	1.65143e-07	0	0	32.5837
CARTPT	1.79769e+308	1.70123e-07	0	0	32.5243
C19orf42	1.79769e+308	1.71092e-07	0	0	32.5125
CELA2A	1.79769e+308	1.85402e-07	0	0	32.3476
KAT5	1.79769e+308	2.30617e-07	0	0	31.9037
HIST1H2BO	1.79769e+308	2.35032e-07	0	0	31.8627
MMACHC	1.79769e+308	2.36148e-07	0	0	31.8513
OR51F1	1.79769e+308	2.51068e-07	0	0	31.7268
OR6C2	1.79769e+308	2.54866e-07	0	0	31.693
OR8H2	1.79769e+308	2.54866e-07	0	0	31.693
WSB2	1.79769e+308	2.61908e-07	0	0	31.6369
OR56A5	1.79769e+308	2.67477e-07	0	0	31.5921
FAM131A	1.79769e+308	2.68913e-07	0	0	31.5809
HIST1H3B	1.79769e+308	2.76412e-07	0	0	31.5252
HIST1H3H	1.79769e+308	2.85835e-07	0	0	31.4585
C2orf57	1.79769e+308	2.88999e-07	0	0	31.4364
UBLCP1	1.79769e+308	2.89542e-07	0	0	31.4319
LOC100287223	1.79769e+308	2.95419e-07	0	0	31.3922
GPR174	1.79769e+308	3.04791e-07	0	0	31.3261
CPA1	1.79769e+308	3.18491e-07	0	0	31.2384
PKIG	1.79769e+308	3.32592e-07	0	0	31.1512
HSPA9	1.79769e+308	3.37681e-07	0	0	31.1202
TRIM16	1.79769e+308	3.68922e-07	0	0	30.9353
CXorf41	1.79769e+308	3.78042e-07	0	0	30.8871
OR1J1	1.79769e+308	4.12317e-07	0	0	30.7118
FOXA2	1.79769e+308	4.26864e-07	0	0	30.6423
C16orf78	1.79769e+308	4.39174e-07	0	0	30.5856
FOXI3	1.79769e+308	4.53252e-07	0	0	30.5228
OR5R1	1.79769e+308	4.53252e-07	0	0	30.5228
GLYATL1	1.79769e+308	4.54359e-07	0	0	30.5166
PLD3	1.79769e+308	4.54359e-07	0	0	30.5166
SELL	1.79769e+308	4.65669e-07	0	0	30.4666
ANKRD36B (NW_001838817 2073..55263)	1.79769e+308	4.73799e-07	0	0	30.4292
ATOX1	1.79769e+308	4.73799e-07	0	0	30.4292
TMEM54	1.79769e+308	5.9446e-07	0	0	29.9696
BRI3	1.79769e+308	6.40585e-07	0	0	29.8194
CDC45	1.79769e+308	6.99557e-07	0	0	29.6412
CTSZ	1.79769e+308	6.99557e-07	0	0	29.6412
DHRS7C	1.79769e+308	7.20041e-07	0	0	29.5823
MPV17	1.79769e+308	7.30757e-07	0	0	29.5529
FAM196B	1.79769e+308	8.04705e-07	0	0	29.3572
COX8A	1.79769e+308	8.07838e-07	0	0	29.3489
ITM2C	1.79769e+308	1.10967e-06	0	0	28.7118
PRHOXNB	1.79769e+308	1.23021e-06	0	0	28.5055
LOC100653263	1.79769e+308	1.26201e-06	0	0	28.451
RPL36AL	1.79769e+308	1.26201e-06	0	0	28.451
MTHFSD	1.79769e+308	1.34158e-06	0	0	28.3246
CNFN	1.79769e+308	1.44179e-06	0	0	28.1816
LYZL6	1.79769e+308	1.47871e-06	0	0	28.1283
PHPT1	1.79769e+308	1.49691e-06	0	0	28.1018
SNRPA1	1.79769e+308	1.49691e-06	0	0	28.1018
TMEM170A	1.79769e+308	1.51586e-06	0	0	28.0752
LYPD2	1.79769e+308	1.67927e-06	0	0	27.8649
CD48	1.79769e+308	1.72382e-06	0	0	27.8129
CDO1	1.79769e+308	1.86015e-06	0	0	27.6578
SIX2	1.79769e+308	1.88432e-06	0	0	27.6321
KISS1R	1.79769e+308	2.03721e-06	0	0	27.4706
CCDC82	1.79769e+308	2.26708e-06	0	0	27.2525
KRTCAP2	1.79769e+308	2.32373e-06	0	0	27.2027
COX6A1	1.79769e+308	2.38244e-06	0	0	27.1531
TMEM61	1.79769e+308	2.41226e-06	0	0	27.1283
TPSG1	1.79769e+308	2.65963e-06	0	0	26.9319
PI3	1.79769e+308	2.75592e-06	0	0	26.859
C1orf174	1.79769e+308	2.84226e-06	0	0	26.7945
LGALS1	1.79769e+308	3.02611e-06	0	0	26.6665
LCK	1.79769e+308	3.04378e-06	0	0	26.6545
NPY	1.79769e+308	3.16766e-06	0	0	26.5712
MRPS22	1.79769e+308	3.28153e-06	0	0	26.5002
XCL2	1.79769e+308	3.54982e-06	0	0	26.3361
NFKBIB	1.79769e+308	3.58906e-06	0	0	26.3128
SMS	1.79769e+308	3.71553e-06	0	0	26.2432
C20orf144	1.79769e+308	3.98118e-06	0	0	26.1051
NDUFS5	1.79769e+308	4.0694e-06	0	0	26.0593
LRRC42	1.79769e+308	4.09724e-06	0	0	26.0441
ANKRD63	1.79769e+308	4.11195e-06	0	0	26.0365
FAU	1.79769e+308	4.45594e-06	0	0	25.8781
LOC100130880	1.79769e+308	4.65973e-06	0	0	25.7884
NSMCE4A	1.79769e+308	4.76703e-06	0	0	25.7437
PIGK	1.79769e+308	4.79293e-06	0	0	25.7326
TTC12	1.79769e+308	4.81894e-06	0	0	25.7215
SGTA	1.79769e+308	4.84337e-06	0	0	25.7104
SYTL3	1.79769e+308	4.88693e-06	0	0	25.6904
CXCL3	1.79769e+308	4.919e-06	0	0	25.6771
C3orf79	1.79769e+308	4.97402e-06	0	0	25.655
MSGN1	1.79769e+308	5.19024e-06	0	0	25.5668
RPL26	1.79769e+308	5.19024e-06	0	0	25.5668
HYDIN (NW_001838324 713..119574)	1.79769e+308	5.36077e-06	0	0	25.5011
RLBP1	1.79769e+308	5.41937e-06	0	0	25.4792
NIPA2	1.79769e+308	5.4552e-06	0	0	25.4647
PRB1	1.79769e+308	5.72186e-06	0	0	25.3706
CDK2AP1	1.79769e+308	5.78232e-06	0	0	25.349
AKR7A2	1.79769e+308	5.84331e-06	0	0	25.3275
CCDC34	1.79769e+308	5.9864e-06	0	0	25.2801
MPI	1.79769e+308	6.19344e-06	0	0	25.2059
TYROBP	1.79769e+308	6.27894e-06	0	0	25.1775
ZMYND12	1.79769e+308	6.3698e-06	0	0	25.1491
CLTB	1.79769e+308	6.41234e-06	0	0	25.1349
GGA2 (NW_001841795 0..2780)	1.79769e+308	6.96748e-06	0	0	24.9662
MYL7	1.79769e+308	7.11784e-06	0	0	24.9244
CUEDC2	1.79769e+308	7.26843e-06	0	0	24.8827
PRSS37	1.79769e+308	7.34473e-06	0	0	24.862
LGALS16	1.79769e+308	7.56732e-06	0	0	24.7998
CATSPERB	1.79769e+308	7.71792e-06	0	0	24.7585
LOC285141	1.79769e+308	7.71792e-06	0	0	24.7585
SERTAD1	1.79769e+308	7.95791e-06	0	0	24.6969
RMND5B	1.79769e+308	7.98345e-06	0	0	24.6901
PDCD1LG2	1.79769e+308	8.27969e-06	0	0	24.6152
SAR1B	1.79769e+308	8.29834e-06	0	0	24.6096
YBX1 (NW_001838578 7664649..7683597)	1.79769e+308	8.35945e-06	0	0	24.5948
ALDOB	1.79769e+308	8.59265e-06	0	0	24.534
FGF4	1.79769e+308	9.20673e-06	0	0	24.3932
C14orf148	1.79769e+308	1.09982e-05	0	0	24.0386
TUBB	1.79769e+308	1.15994e-05	0	0	23.9323
C12orf45	1.79769e+308	1.1642e-05	0	0	23.9226
LY96	1.79769e+308	1.1642e-05	0	0	23.9226
CD37	1.79769e+308	1.17549e-05	0	0	23.9034
HSD17B11	1.79769e+308	1.21671e-05	0	0	23.8332
MEIG1	1.79769e+308	1.23126e-05	0	0	23.8078
FHAD1	1.79769e+308	1.23349e-05	0	0	23.8031
ADAT2	1.79769e+308	1.25333e-05	0	0	23.7698
WDR38	1.79769e+308	1.25333e-05	0	0	23.7698
TFDP1	1.79769e+308	1.27073e-05	0	0	23.7413
MDH1	1.79769e+308	1.3006e-05	0	0	23.6941
KIAA1609	1.79769e+308	1.32544e-05	0	0	23.6564
CLC	1.79769e+308	1.34889e-05	0	0	23.6189
PGRMC1	1.79769e+308	1.35633e-05	0	0	23.6064
LOC554223	1.79769e+308	1.40047e-05	0	0	23.5441
AZGP1	1.79769e+308	1.4113e-05	0	0	23.5255
CCZ1 (NW_001838999 1820..4411)	1.79769e+308	1.42407e-05	0	0	23.5069
CNGA4	1.79769e+308	1.53162e-05	0	0	23.3593
GSTM4	1.79769e+308	1.58733e-05	0	0	23.2862
MED28	1.79769e+308	1.6298e-05	0	0	23.2317
HEBP2	1.79769e+308	1.64363e-05	0	0	23.2135
PACS1	1.79769e+308	1.64752e-05	0	0	23.2084
ORC3	1.79769e+308	1.7032e-05	0	0	23.1413
ATP5G1	1.79769e+308	1.79587e-05	0	0	23.0339
GLRX2	1.79769e+308	1.82782e-05	0	0	22.9983
CCIN	1.79769e+308	1.84792e-05	0	0	22.9746
FAM21A (NW_001837983 495..13554)	1.79769e+308	1.993e-05	0	0	22.8219
HINT2	1.79769e+308	1.993e-05	0	0	22.8219
MDH2	1.79769e+308	2.02892e-05	0	0	22.787
PPBP	1.79769e+308	2.04609e-05	0	0	22.7695
GSTO1	1.79769e+308	2.09699e-05	0	0	22.7174
RWDD1	1.79769e+308	2.11531e-05	0	0	22.7
LRRC71	1.79769e+308	2.18129e-05	0	0	22.6367
WFDC9	1.79769e+308	2.24154e-05	0	0	22.5795
MC5R	1.79769e+308	2.27964e-05	0	0	22.5453
IFI27	1.79769e+308	2.31679e-05	0	0	22.5112
TMOD4	1.79769e+308	2.31679e-05	0	0	22.5112
RABGAP1L	1.79769e+308	2.35443e-05	0	0	22.4772
DUPD1	1.79769e+308	2.39256e-05	0	0	22.4433
PCBP3	1.79769e+308	2.39256e-05	0	0	22.4433
SLAMF7	1.79769e+308	2.44421e-05	0	0	22.401
VAMP5	1.79769e+308	2.47579e-05	0	0	22.3758
VTI1B	1.79769e+308	2.49519e-05	0	0	22.359
C17orf87	1.79769e+308	2.5155e-05	0	0	22.3422
ISG15	1.79769e+308	2.55332e-05	0	0	22.3087
CENPB	1.79769e+308	2.63048e-05	0	0	22.2503
TUBA3C	1.79769e+308	2.64023e-05	0	0	22.242
LILRA6 (NW_001841812 0..3815)	1.79769e+308	2.7087e-05	0	0	22.1922
C19orf71	1.79769e+308	2.73127e-05	0	0	22.1757
PLAC9	1.79769e+308	2.81956e-05	0	0	22.1098
IL12RB1	1.79769e+308	3.10513e-05	0	0	21.9144
CEACAM21	1.79769e+308	3.13036e-05	0	0	21.8983
LAMTOR2	1.79769e+308	3.20604e-05	0	0	21.85
PRKACA	1.79769e+308	3.25394e-05	0	0	21.818
C1orf53	1.79769e+308	3.30652e-05	0	0	21.7861
SEPX1	1.79769e+308	3.33203e-05	0	0	21.7701
HNRNPR	1.79769e+308	3.41057e-05	0	0	21.7225
PPIAL4B	1.79769e+308	3.74097e-05	0	0	21.5338
SFT2D1	1.79769e+308	3.74097e-05	0	0	21.5338
FGR	1.79769e+308	3.88832e-05	0	0	21.4562
DAD1	1.79769e+308	4.09796e-05	0	0	21.3485
NDUFB10	1.79769e+308	4.09796e-05	0	0	21.3485
TIMM23 (NW_001837979 324638..342989)	1.79769e+308	4.41462e-05	0	0	21.1964
SULT2B1	1.79769e+308	4.4469e-05	0	0	21.1813
KRTAP3-3	1.79769e+308	4.55137e-05	0	0	21.1362
ELP2	1.79769e+308	4.61751e-05	0	0	21.1062
TFF2	1.79769e+308	4.81469e-05	0	0	21.0168
ZFP64	1.79769e+308	5.10993e-05	0	0	20.8987
COMMD1	1.79769e+308	5.18246e-05	0	0	20.8694
GCHFR	1.79769e+308	5.18246e-05	0	0	20.8694
MIOX	1.79769e+308	5.61466e-05	0	0	20.7096
C9orf9	1.79769e+308	5.65365e-05	0	0	20.6952
IFI16	1.79769e+308	6.19878e-05	0	0	20.5098
KIAA1033	1.79769e+308	6.24283e-05	0	0	20.4957
LOC401847	1.79769e+308	6.41195e-05	0	0	20.4394
ORMDL1	1.79769e+308	6.41195e-05	0	0	20.4394
IQCF1	1.79769e+308	6.59448e-05	0	0	20.3834
PLEK2	1.79769e+308	6.59448e-05	0	0	20.3834
POMP	1.79769e+308	6.6853e-05	0	0	20.3555
MPP1	1.79769e+308	6.81402e-05	0	0	20.3185
C4orf29	1.79769e+308	6.90519e-05	0	0	20.2907
THTPA	1.79769e+308	6.90519e-05	0	0	20.2907
SF3B5	1.79769e+308	7.25132e-05	0	0	20.1898
C10orf91	1.79769e+308	7.34272e-05	0	0	20.1624
IER3IP1	1.79769e+308	7.57739e-05	0	0	20.0944
LOC644662	1.79769e+308	7.62232e-05	0	0	20.0808
C11orf20	1.79769e+308	7.93101e-05	0	0	19.9998
RBMX	1.79769e+308	8.00794e-05	0	0	19.9797
PEBP1	1.79769e+308	8.08783e-05	0	0	19.9596
GOLM1 (NW_001839222 4084..46423)	1.79769e+308	8.13747e-05	0	0	19.9462
MRPS23	1.79769e+308	8.13747e-05	0	0	19.9462
GPHA2	1.79769e+308	8.24468e-05	0	0	19.9195
MBD3L1	1.79769e+308	8.34568e-05	0	0	19.8929
CST5	1.79769e+308	8.45504e-05	0	0	19.8663
HSPA1A	1.79769e+308	8.45504e-05	0	0	19.8663
SPACA1	1.79769e+308	8.51138e-05	0	0	19.8531
FLJ27352	1.79769e+308	8.79502e-05	0	0	19.7871
TPRKB	1.79769e+308	8.79502e-05	0	0	19.7871
YIPF2	1.79769e+308	8.79502e-05	0	0	19.7871
ZFYVE21	1.79769e+308	8.97034e-05	0	0	19.7477
UTS2	1.79769e+308	9.1378e-05	0	0	19.7085
C4orf14	1.79769e+308	9.41917e-05	0	0	19.6477
PRKCSH	1.79769e+308	9.62034e-05	0	0	19.6046
RNF19A	1.79769e+308	9.80002e-05	0	0	19.5659
IRF2	1.79769e+308	9.8192e-05	0	0	19.5616
PPIP5K1 (NW_001838214 225..45386)	1.79769e+308	0.00010027	0	0	19.5189
GPR101	1.79769e+308	0.00010176	0	0	19.489
C13orf41	1.79769e+308	0.000109088	0	0	19.3497
LMBRD1	1.79769e+308	0.000109505	0	0	19.3413
COX5A	1.79769e+308	0.000110248	0	0	19.3245
MRPS6	1.79769e+308	0.000110248	0	0	19.3245
SMCP	1.79769e+308	0.000110248	0	0	19.3245
TMEM68	1.79769e+308	0.000112427	0	0	19.2828
N4BP2L1	1.79769e+308	0.000112886	0	0	19.2745
HIST1H1D	1.79769e+308	0.000115639	0	0	19.2247
CCNB2	1.79769e+308	0.000116293	0	0	19.2122
PSMB7	1.79769e+308	0.000118477	0	0	19.1751
PRMT8	1.79769e+308	0.000125775	0	0	19.0523
USP11	1.79769e+308	0.000125775	0	0	19.0523
U2AF1L4	1.79769e+308	0.000127355	0	0	19.028
METTL22	1.79769e+308	0.000131929	0	0	18.9553
SLC35D3	1.79769e+308	0.000134057	0	0	18.9231
ARHGEF18 (NW_001838479 5307..56991)	1.79769e+308	0.000135112	0	0	18.9071
JTB	1.79769e+308	0.000135112	0	0	18.9071
IFLTD1	1.79769e+308	0.000136745	0	0	18.8831
CPNE7	1.79769e+308	0.000139782	0	0	18.8353
DERL1	1.79769e+308	0.00014018	0	0	18.8293
ATP6V0D2	1.79769e+308	0.000142478	0	0	18.7956
METTL20	1.79769e+308	0.000145897	0	0	18.7483
MIIP	1.79769e+308	0.000146419	0	0	18.7404
FER1L5 (NW_001842295 1091..3667)	1.79769e+308	0.000148157	0	0	18.7168
SAMD1	1.79769e+308	0.000149911	0	0	18.6933
C13orf33	1.79769e+308	0.000151062	0	0	18.6777
KIR2DL1	1.79769e+308	0.000155142	0	0	18.6231
CNPY2	1.79769e+308	0.00015605	0	0	18.6115
UBE2C	1.79769e+308	0.000157832	0	0	18.5882
ODF3L2	1.79769e+308	0.000159631	0	0	18.565
LY6D	1.79769e+308	0.000160424	0	0	18.5535
NDUFA9	1.79769e+308	0.000165076	0	0	18.4958
AKR1E2	1.79769e+308	0.000165982	0	0	18.4843
GNG5	1.79769e+308	0.000167898	0	0	18.4614
DRGX	1.79769e+308	0.000169784	0	0	18.4385
LRRC20	1.79769e+308	0.000173606	0	0	18.3929
NME7	1.79769e+308	0.000178649	0	0	18.3363
C17orf67	1.79769e+308	0.000179612	0	0	18.325
VBP1	1.79769e+308	0.000183552	0	0	18.28
SS18L2	1.79769e+308	0.000185573	0	0	18.2575
CBX3	1.79769e+308	0.000188294	0	0	18.2277
RAF1	1.79769e+308	0.000193423	0	0	18.1739
MAP3K5	1.79769e+308	0.000197565	0	0	18.1315
LOC100507650	1.79769e+308	0.00020042	0	0	18.102
TIMM8B	1.79769e+308	0.000202527	0	0	18.0801
MYCL1	1.79769e+308	0.0002073	0	0	18.0326
TSPYL4	1.79769e+308	0.000211352	0	0	17.9926
MPND	1.79769e+308	0.000214824	0	0	17.96
DCXR	1.79769e+308	0.000215815	0	0	17.9492
RPS29	1.79769e+308	0.000215815	0	0	17.9492
TIMM17A	1.79769e+308	0.000216986	0	0	17.9384
GLP2R	1.79769e+308	0.000220529	0	0	17.906
LOC100653241	1.79769e+308	0.000220529	0	0	17.906
PRY2	1.79769e+308	0.000220529	0	0	17.906
MCPH1	1.79769e+308	0.000231058	0	0	17.8131
LPPR4	1.79769e+308	0.000235963	0	0	17.7706
FABP4	1.79769e+308	0.000237594	0	0	17.7564
TIMP2	1.79769e+308	0.000241328	0	0	17.7247
IFNB1	1.79769e+308	0.000242604	0	0	17.7141
CPM	1.79769e+308	0.000244834	0	0	17.6957
BCL2L13	1.79769e+308	0.000246879	0	0	17.6773
SURF2	1.79769e+308	0.000252323	0	0	17.6302
HSPA1L	1.79769e+308	0.000256561	0	0	17.5954
HAO2	1.79769e+308	0.000262682	0	0	17.547
AURKA	1.79769e+308	0.000265411	0	0	17.5264
LOC730755	1.79769e+308	0.000276617	0	0	17.4442
TNFRSF14	1.79769e+308	0.000278033	0	0	17.434
FAM131B	1.79769e+308	0.000279082	0	0	17.4237
LILRA4	1.79769e+308	0.000279082	0	0	17.4237
ARHGAP25	1.79769e+308	0.000281035	0	0	17.4085
C7orf44	1.79769e+308	0.000287415	0	0	17.3628
TMEM55B	1.79769e+308	0.000287415	0	0	17.3628
FKBP6	1.79769e+308	0.000288873	0	0	17.3526
FAM71F1	1.79769e+308	0.000293047	0	0	17.3223
SPATA22	1.79769e+308	0.000294449	0	0	17.3123
CDSN	1.79769e+308	0.000295855	0	0	17.3022
RELL2	1.79769e+308	0.000298762	0	0	17.2821
TSGA10IP	1.79769e+308	0.000304884	0	0	17.242
C22orf15	1.79769e+308	0.000307777	0	0	17.2221
CTRB2	1.79769e+308	0.000307777	0	0	17.2221
ISM1	1.79769e+308	0.000307777	0	0	17.2221
RPS4Y1	1.79769e+308	0.000307777	0	0	17.2221
PBX4	1.79769e+308	0.00031069	0	0	17.2022
MAP2K2	1.79769e+308	0.000316492	0	0	17.1625
DYNC1I2	1.79769e+308	0.000317427	0	0	17.1559
TRAPPC1	1.79769e+308	0.000322463	0	0	17.123
LYZL4	1.79769e+308	0.000331573	0	0	17.0641
N6AMT2	1.79769e+308	0.000331573	0	0	17.0641
TMEM150B	1.79769e+308	0.00034141	0	0	17.0056
ZNF384	1.79769e+308	0.000347636	0	0	16.9668
CPN1	1.79769e+308	0.000350916	0	0	16.9475
CD300LF	1.79769e+308	0.000355834	0	0	16.9186
LGALS9	1.79769e+308	0.000363988	0	0	16.8706
CPB2	1.79769e+308	0.000367192	0	0	16.8515
SLC25A4	1.79769e+308	0.000370417	0	0	16.8324
HRCT1	1.79769e+308	0.00037376	0	0	16.8134
KCNN1	1.79769e+308	0.000376163	0	0	16.8008
DUSP21	1.79769e+308	0.00037732	0	0	16.7944
MICU1	1.79769e+308	0.000396096	0	0	16.694
EDDM3B	1.79769e+308	0.000413607	0	0	16.607
MAPKAPK2	1.79769e+308	0.00041836	0	0	16.5839
VPS37C	1.79769e+308	0.000418592	0	0	16.5823
C3orf27	1.79769e+308	0.000424887	0	0	16.5516
OR51B5	1.79769e+308	0.000424887	0	0	16.5516
NAGK	1.79769e+308	0.000430556	0	0	16.524
CD2AP	1.79769e+308	0.000438615	0	0	16.4874
CLDN22	1.79769e+308	0.000440506	0	0	16.4783
C11orf91	1.79769e+308	0.000452556	0	0	16.4237
MRPL55	1.79769e+308	0.000452556	0	0	16.4237
DDX19B	1.79769e+308	0.000458498	0	0	16.3966
C19orf43	1.79769e+308	0.000468339	0	0	16.3515
C19orf53	1.79769e+308	0.000468339	0	0	16.3515
GCDH	1.79769e+308	0.000472664	0	0	16.3336
AZU1	1.79769e+308	0.000476909	0	0	16.3157
RGS8	1.79769e+308	0.000476909	0	0	16.3157
ANPEP	1.79769e+308	0.000478921	0	0	16.3067
CCDC53	1.79769e+308	0.00048106	0	0	16.2978
CNOT10	1.79769e+308	0.000483843	0	0	16.2859
TBX20	1.79769e+308	0.000485238	0	0	16.28
CDC42SE2	1.79769e+308	0.000487399	0	0	16.2711
SULT1C3	1.79769e+308	0.000489194	0	0	16.2622
TSNARE1	1.79769e+308	0.000489194	0	0	16.2622
NFKBID	1.79769e+308	0.000497427	0	0	16.2267
GPR141	1.79769e+308	0.000501201	0	0	16.209
GLOD4	1.79769e+308	0.000503159	0	0	16.2002
PHLDA2	1.79769e+308	0.000509837	0	0	16.1738
FARS2	1.79769e+308	0.000511949	0	0	16.165
COX6C	1.79769e+308	0.000513937	0	0	16.1562
IL4	1.79769e+308	0.000513937	0	0	16.1562
LAT	1.79769e+308	0.000520458	0	0	16.13
PRPH	1.79769e+308	0.000525015	0	0	16.1125
CCL11	1.79769e+308	0.000526907	0	0	16.1038
CTSG	1.79769e+308	0.000526907	0	0	16.1038
DCTN3	1.79769e+308	0.000526907	0	0	16.1038
OR13G1	1.79769e+308	0.000526907	0	0	16.1038
SMOC1	1.79769e+308	0.000529203	0	0	16.0951
COMMD4	1.79769e+308	0.000531105	0	0	16.0864
PSMB4	1.79769e+308	0.000531105	0	0	16.0864
RALGDS	1.79769e+308	0.000534504	0	0	16.0733
DNMT3B	1.79769e+308	0.000535461	0	0	16.069
CALML4	1.79769e+308	0.000539167	0	0	16.0517
NBPF4 (NW_001840314 1945..12307)	1.79769e+308	0.000539167	0	0	16.0517
OSM	1.79769e+308	0.000539167	0	0	16.0517
PBK	1.79769e+308	0.000539167	0	0	16.0517
C9orf114	1.79769e+308	0.00054357	0	0	16.0344
ANGPTL6	1.79769e+308	0.000545918	0	0	16.0257
SAMD14	1.79769e+308	0.000550361	0	0	16.0085
OR1L8	1.79769e+308	0.000552179	0	0	15.9999
OR4A47	1.79769e+308	0.000552179	0	0	15.9999
FAM181B	1.79769e+308	0.000554277	0	0	15.9913
TMIE	1.79769e+308	0.000554277	0	0	15.9913
IRF3	1.79769e+308	0.000559047	0	0	15.9741
OR2A42	1.79769e+308	0.000566401	0	0	15.9484
OR5AR1	1.79769e+308	0.000566401	0	0	15.9484
RP2	1.79769e+308	0.000567539	0	0	15.9442
SULT6B1	1.79769e+308	0.00057068	0	0	15.9314
OR8H1	1.79769e+308	0.000580748	0	0	15.8973
C17orf79	1.79769e+308	0.000585395	0	0	15.8803
METTL11B	1.79769e+308	0.000590069	0	0	15.8634
LOC100130830	1.79769e+308	0.000594475	0	0	15.8465
MANF	1.79769e+308	0.000594475	0	0	15.8465
OR4F6	1.79769e+308	0.000594475	0	0	15.8465
OR51B6	1.79769e+308	0.000594475	0	0	15.8465
ARL5C	1.79769e+308	0.000604551	0	0	15.8128
BATF	1.79769e+308	0.000604551	0	0	15.8128
PTOV1	1.79769e+308	0.000609486	0	0	15.7961
FGFR1OP	1.79769e+308	0.000614754	0	0	15.7793
RHD	1.79769e+308	0.000623559	0	0	15.7515
OR10A6	1.79769e+308	0.000624621	0	0	15.7459
OR9I1	1.79769e+308	0.000624621	0	0	15.7459
VWC2	1.79769e+308	0.000627067	0	0	15.7376
ATP8B4	1.79769e+308	0.000628753	0	0	15.732
ZNF706	1.79769e+308	0.000638164	0	0	15.7016
OR8J3	1.79769e+308	0.000639714	0	0	15.6961
LCMT2	1.79769e+308	0.000644856	0	0	15.6795
TROAP	1.79769e+308	0.000653332	0	0	15.652
OR2T11	1.79769e+308	0.000654908	0	0	15.6466
EPHX1	1.79769e+308	0.000670854	0	0	15.5974
C17orf80	1.79769e+308	0.000674554	0	0	15.5851
C9orf21	1.79769e+308	0.000675515	0	0	15.581
CALR	1.79769e+308	0.000675515	0	0	15.581
PAX1	1.79769e+308	0.000679077	0	0	15.5702
CABP2	1.79769e+308	0.000685906	0	0	15.5485
PRSS41	1.79769e+308	0.000685906	0	0	15.5485
OAZ2	1.79769e+308	0.000691145	0	0	15.5322
NGFRAP1	1.79769e+308	0.000701879	0	0	15.4999
LEMD1	1.79769e+308	0.000707032	0	0	15.4837
OR5C1	1.79769e+308	0.000718116	0	0	15.4516
RHAG	1.79769e+308	0.000728971	0	0	15.4196
C12orf71	1.79769e+308	0.000734443	0	0	15.4036
GJD2	1.79769e+308	0.000734443	0	0	15.4036
OR52N2	1.79769e+308	0.000734443	0	0	15.4036
ACAA2	1.79769e+308	0.000739943	0	0	15.3877
STX8	1.79769e+308	0.000745653	0	0	15.3718
GPR172A	1.79769e+308	0.000751213	0	0	15.3559
PNCK	1.79769e+308	0.000754004	0	0	15.348
SARS	1.79769e+308	0.000754004	0	0	15.348
POU3F3	1.79769e+308	0.000762605	0	0	15.3243
UPP1	1.79769e+308	0.000765611	0	0	15.3164
WBP2	1.79769e+308	0.000768255	0	0	15.3085
SCPEP1	1.79769e+308	0.000771277	0	0	15.3006
PDE4DIP (NW_001838628 1040..10048)	1.79769e+308	0.000774121	0	0	15.2928
EMID2	1.79769e+308	0.000779456	0	0	15.2771
SLC38A6	1.79769e+308	0.000779456	0	0	15.2771
KIF5A	1.79769e+308	0.0007807	0	0	15.2732
CALHM2	1.79769e+308	0.00078157	0	0	15.2692
OR6K2	1.79769e+308	0.000784063	0	0	15.2614
TRIM49 (NW_001838033 1457..2432)	1.79769e+308	0.000784063	0	0	15.2614
PLA2G4A	1.79769e+308	0.000790013	0	0	15.2458
CXorf59	1.79769e+308	0.000802202	0	0	15.2146
TMED8	1.79769e+308	0.000802202	0	0	15.2146
OR5T1	1.79769e+308	0.000821034	0	0	15.1681
HELT	1.79769e+308	0.000839786	0	0	15.1218
PLSCR5	1.79769e+308	0.000842405	0	0	15.1142
HDGFRP3	1.79769e+308	0.000855171	0	0	15.0835
NPBWR1	1.79769e+308	0.000857823	0	0	15.0759
IGSF23	1.79769e+308	0.000870135	0	0	15.0454
C6orf136	1.79769e+308	0.000873232	0	0	15.0378
C12orf11	1.79769e+308	0.000889467	0	0	14.9999
ACSBG1	1.79769e+308	0.00089837	0	0	14.9797
ODF1	1.79769e+308	0.000902525	0	0	14.9697
PDHX	1.79769e+308	0.000915935	0	0	14.9396
LYRM4	1.79769e+308	0.000919147	0	0	14.9321
CYB5D2	1.79769e+308	0.000929049	0	0	14.9097
PDGFD	1.79769e+308	0.00093067	0	0	14.906
BTG4	1.79769e+308	0.000935987	0	0	14.8948
FAM113A	1.79769e+308	0.000939248	0	0	14.8873
ISM2	1.79769e+308	0.00094433	0	0	14.8749
PMF1-BGLAP	1.79769e+308	0.000948856	0	0	14.865
LOC100509860	1.79769e+308	0.000955674	0	0	14.8502
NPBWR2	1.79769e+308	0.000955674	0	0	14.8502
AOC3	1.79769e+308	0.000987596	0	0	14.7838
PAX4	1.79769e+308	0.000997548	0	0	14.7618
HOXA7	1.79769e+308	0.00100344	0	0	14.7472
FEZ1	1.79769e+308	0.00101314	0	0	14.7277
CREG1	1.79769e+308	0.00103202	0	0	14.6889
PRG4	1.79769e+308	0.00103202	0	0	14.6889
LOC100507656	1.79769e+308	0.00103853	0	0	14.6744
RTP4	1.79769e+308	0.00103853	0	0	14.6744
TMEM14A	1.79769e+308	0.00104579	0	0	14.66
DPH3	1.79769e+308	0.00105157	0	0	14.6492
CHRNA2	1.79769e+308	0.0010589	0	0	14.6347
NUDCD1	1.79769e+308	0.00108648	0	0	14.5845
ERCC8	1.79769e+308	0.00109919	0	0	14.5596
SPAG7	1.79769e+308	0.00112278	0	0	14.517
F12	1.79769e+308	0.00112622	0	0	14.5099
FLYWCH2	1.79769e+308	0.00113738	0	0	14.4887
OR10H2	1.79769e+308	0.00115265	0	0	14.4605
NMNAT3	1.79769e+308	0.00119131	0	0	14.3906
RER1	1.79769e+308	0.00119131	0	0	14.3906
CADM4	1.79769e+308	0.00119544	0	0	14.3836
SNAPIN	1.79769e+308	0.00119958	0	0	14.3767
TATDN1	1.79769e+308	0.00120763	0	0	14.3628
BCLAF1	1.79769e+308	0.00121371	0	0	14.3529
CMTM3	1.79769e+308	0.00122326	0	0	14.3351
HES4	1.79769e+308	0.0012396	0	0	14.3076
LOC100507293	1.79769e+308	0.00124783	0	0	14.2938
KRTAP4-6	1.79769e+308	0.00126411	0	0	14.2664
OAT	1.79769e+308	0.00128925	0	0	14.2255
NPR1	1.79769e+308	0.00129333	0	0	14.2187
PINX1	1.79769e+308	0.00129771	0	0	14.2119
PPAPDC3	1.79769e+308	0.0013018	0	0	14.2051
SRI	1.79769e+308	0.0013018	0	0	14.2051
C1orf65	1.79769e+308	0.00131473	0	0	14.1848
PPWD1	1.79769e+308	0.00131473	0	0	14.1848
C8orf59	1.79769e+308	0.00132361	0	0	14.1713
ZMPSTE24	1.79769e+308	0.0013354	0	0	14.1533
TOR1A	1.79769e+308	0.00134117	0	0	14.1444
AMN1	1.79769e+308	0.00136706	0	0	14.1042
ALG14	1.79769e+308	0.00138565	0	0	14.0775
NUDT2	1.79769e+308	0.00141276	0	0	14.0376
RNASE6	1.79769e+308	0.00142177	0	0	14.0244
UPF3A	1.79769e+308	0.00144024	0	0	13.998
SCAP	1.79769e+308	0.00144619	0	0	13.9881
C10orf120	1.79769e+308	0.00144774	0	0	13.9849
MYL6B	1.79769e+308	0.00144774	0	0	13.9849
HMX3	1.79769e+308	0.00145592	0	0	13.9717
LOC390937	1.79769e+308	0.00145592	0	0	13.9717
FAM123A	1.79769e+308	0.00146479	0	0	13.9586
GADD45G	1.79769e+308	0.00146479	0	0	13.9586
CPSF3L	1.79769e+308	0.0014785	0	0	13.939
FHL5	1.79769e+308	0.0014785	0	0	13.939
IVL	1.79769e+308	0.0014785	0	0	13.939
OR1I1	1.79769e+308	0.00148264	0	0	13.9325
ORMDL3	1.79769e+308	0.00149713	0	0	13.9129
AFG3L2	1.79769e+308	0.00149852	0	0	13.9108
RSPO3	1.79769e+308	0.00150684	0	0	13.8999
C16orf91	1.79769e+308	0.00151104	0	0	13.8934
DPAGT1	1.79769e+308	0.00151104	0	0	13.8934
FDX1	1.79769e+308	0.00152995	0	0	13.8676
NAT8	1.79769e+308	0.00152995	0	0	13.8676
TRPT1	1.79769e+308	0.00153878	0	0	13.8546
KRTAP4-12	1.79769e+308	0.00156826	0	0	13.816
RNF208	1.79769e+308	0.00156826	0	0	13.816
SIGLEC6	1.79769e+308	0.00157327	0	0	13.8096
CAPZA3	1.79769e+308	0.00157794	0	0	13.8032
TIMM9	1.79769e+308	0.00157794	0	0	13.8032
PLCD4	1.79769e+308	0.00158766	0	0	13.7904
DHDH	1.79769e+308	0.00160865	0	0	13.7649
MTERF	1.79769e+308	0.0016134	0	0	13.7586
DDB1	1.79769e+308	0.0016424	0	0	13.7205
C1orf123	1.79769e+308	0.00164685	0	0	13.7142
RAE1	1.79769e+308	0.00164685	0	0	13.7142
SMAP2	1.79769e+308	0.00165351	0	0	13.7058
C18orf8	1.79769e+308	0.00166206	0	0	13.6952
INHBA	1.79769e+308	0.00167139	0	0	13.6826
PRSS44	1.79769e+308	0.00167663	0	0	13.6764
H2AFY2	1.79769e+308	0.00169053	0	0	13.6575
GDI1	1.79769e+308	0.00169581	0	0	13.6513
SAMD10	1.79769e+308	0.00170035	0	0	13.645
TAPT1	1.79769e+308	0.00170035	0	0	13.645
OXTR	1.79769e+308	0.00170243	0	0	13.6419
PPP3CC	1.79769e+308	0.00174227	0	0	13.5951
C16orf55	1.79769e+308	0.00174689	0	0	13.5889
RPRML	1.79769e+308	0.00174689	0	0	13.5889
SLC15A4	1.79769e+308	0.00174689	0	0	13.5889
REG3A	1.79769e+308	0.00176816	0	0	13.5642
DPH1	1.79769e+308	0.0017736	0	0	13.558
TMEM225	1.79769e+308	0.00177905	0	0	13.5518
EPHX2	1.79769e+308	0.00179391	0	0	13.5333
PPIF	1.79769e+308	0.0018053	0	0	13.521
KDM4DL	1.79769e+308	0.00181516	0	0	13.5087
TTC8	1.79769e+308	0.00181516	0	0	13.5087
CALML6	1.79769e+308	0.00183101	0	0	13.4904
CLTCL1	1.79769e+308	0.00183101	0	0	13.4904
RECK	1.79769e+308	0.00183101	0	0	13.4904
KLHL9	1.79769e+308	0.00183619	0	0	13.4843
SLC24A1	1.79769e+308	0.00186341	0	0	13.4538
CROT	1.79769e+308	0.00187066	0	0	13.4457
NT5C1A	1.79769e+308	0.00187347	0	0	13.4416
HFE2	1.79769e+308	0.00187913	0	0	13.4356
C6orf72	1.79769e+308	0.00189577	0	0	13.4174
EEF1B2	1.79769e+308	0.00190595	0	0	13.4053
MRPL13	1.79769e+308	0.00190595	0	0	13.4053
OR2T1	1.79769e+308	0.00190595	0	0	13.4053
EFNB1	1.79769e+308	0.00191658	0	0	13.3932
KLHL12	1.79769e+308	0.0019318	0	0	13.3772
TNFRSF1A	1.79769e+308	0.00193881	0	0	13.3692
DARS2	1.79769e+308	0.00197418	0	0	13.3332
LMNA	1.79769e+308	0.00197418	0	0	13.3332
NXT1	1.79769e+308	0.00198635	0	0	13.3213
IGFBP4	1.79769e+308	0.00199858	0	0	13.3094
LOC100506597	1.79769e+308	0.00200956	0	0	13.2975
CAMKK1	1.79769e+308	0.00201419	0	0	13.2915
CPNE2	1.79769e+308	0.00201419	0	0	13.2915
HEMGN	1.79769e+308	0.00201419	0	0	13.2915
CAMK4	1.79769e+308	0.00203031	0	0	13.2738
MAP1LC3A	1.79769e+308	0.00203031	0	0	13.2738
YIF1A	1.79769e+308	0.00203031	0	0	13.2738
MB21D2	1.79769e+308	0.00204823	0	0	13.2541
SPHAR	1.79769e+308	0.00205076	0	0	13.2501
USP40	1.79769e+308	0.00205549	0	0	13.2454
HAUS1	1.79769e+308	0.00207223	0	0	13.2266
HLA-DMA	1.79769e+308	0.00207223	0	0	13.2266
RIN2	1.79769e+308	0.00208257	0	0	13.2148
GRTP1	1.79769e+308	0.00214162	0	0	13.1564
C8orf55	1.79769e+308	0.00215356	0	0	13.1448
HSD17B3	1.79769e+308	0.00217758	0	0	13.1216
POLE3	1.79769e+308	0.00217758	0	0	13.1216
TSN	1.79769e+308	0.00220177	0	0	13.0985
C11orf49	1.79769e+308	0.00220667	0	0	13.0927
C5orf15	1.79769e+308	0.00225807	0	0	13.0468
SRP54	1.79769e+308	0.00225807	0	0	13.0468
AMPH	1.79769e+308	0.00227689	0	0	13.0297
NEU2	1.79769e+308	0.00228787	0	0	13.0183
ZNF707	1.79769e+308	0.00228787	0	0	13.0183
GNPDA1	1.79769e+308	0.00229386	0	0	13.0126
GRPR	1.79769e+308	0.00231239	0	0	12.9955
PHF1	1.79769e+308	0.00231239	0	0	12.9955
CDC16	1.79769e+308	0.002332	0	0	12.9785
IQCC	1.79769e+308	0.002332	0	0	12.9785
CYP27A1	1.79769e+308	0.00233707	0	0	12.9729
TAAR5	1.79769e+308	0.00233707	0	0	12.9729
CYR61	1.79769e+308	0.00234364	0	0	12.9672
LSM4	1.79769e+308	0.00234973	0	0	12.9616
LPCAT3	1.79769e+308	0.00235582	0	0	12.9559
CAT	1.79769e+308	0.00236855	0	0	12.9447
DMRTA1	1.79769e+308	0.00238898	0	0	12.9278
ADAD2	1.79769e+308	0.0024008	0	0	12.9166
HLA-DQA2	1.79769e+308	0.0024008	0	0	12.9166
MYL1	1.79769e+308	0.0024008	0	0	12.9166
PIGL	1.79769e+308	0.0024008	0	0	12.9166
NCR1	1.79769e+308	0.00241064	0	0	12.9054
PRR25	1.79769e+308	0.00241064	0	0	12.9054
C9orf129	1.79769e+308	0.00242304	0	0	12.8942
DEPDC4	1.79769e+308	0.00243651	0	0	12.883
C7orf45	1.79769e+308	0.002449	0	0	12.8719
BCAS1	1.79769e+308	0.00246589	0	0	12.857
GPC3	1.79769e+308	0.00250042	0	0	12.8275
NLRP9	1.79769e+308	0.00251913	0	0	12.8128
SRSF9	1.79769e+308	0.00254291	0	0	12.7944
PDIA6	1.79769e+308	0.00255575	0	0	12.7834
MED17	1.79769e+308	0.00257923	0	0	12.7651
TCEAL5	1.79769e+308	0.0025821	0	0	12.7615
GAS2L3	1.79769e+308	0.00258858	0	0	12.756
CNPY4	1.79769e+308	0.00259345	0	0	12.7505
HLA-DRB1	1.79769e+308	0.002607	0	0	12.7396
TMEM95	1.79769e+308	0.00262059	0	0	12.7287
ZBTB48	1.79769e+308	0.00262059	0	0	12.7287
ZNF641	1.79769e+308	0.00264846	0	0	12.7043
ZNF281	1.79769e+308	0.00268298	0	0	12.6781
DRG1 (NW_001838745 9884335..9911404)	1.79769e+308	0.00271594	0	0	12.653
GRIK5	1.79769e+308	0.00271594	0	0	12.653
MFAP2	1.79769e+308	0.00271594	0	0	12.653
RHEBL1	1.79769e+308	0.00273047	0	0	12.6422
FIGNL1	1.79769e+308	0.00273513	0	0	12.6386
REXO4	1.79769e+308	0.00277437	0	0	12.6101
FBXL15	1.79769e+308	0.00278853	0	0	12.5994
FGFBP1	1.79769e+308	0.00280158	0	0	12.5887
LCA5L	1.79769e+308	0.00280158	0	0	12.5887
IARS2	1.79769e+308	0.00281641	0	0	12.5781
SLAIN1	1.79769e+308	0.00282117	0	0	12.5745
NDUFA6	1.79769e+308	0.00282837	0	0	12.5675
TCEAL7	1.79769e+308	0.00282837	0	0	12.5675
PDSS2	1.79769e+308	0.00283256	0	0	12.5639
EGR4	1.79769e+308	0.00286342	0	0	12.541
GSC	1.79769e+308	0.00290113	0	0	12.5146
SUSD3	1.79769e+308	0.00291451	0	0	12.5041
C9orf95	1.79769e+308	0.0029585	0	0	12.4727
IL32	1.79769e+308	0.0029585	0	0	12.4727
EIF3J	1.79769e+308	0.0029828	0	0	12.457
SLC27A2	1.79769e+308	0.00299826	0	0	12.4466
SEPT4	1.79769e+308	0.00305812	0	0	12.4051
C6orf58	1.79769e+308	0.00306597	0	0	12.3999
CLDN19	1.79769e+308	0.0030754	0	0	12.393
TRAPPC4	1.79769e+308	0.00307982	0	0	12.3896
TSEN34	1.79769e+308	0.00307982	0	0	12.3896
C16orf42	1.79769e+308	0.00312669	0	0	12.3587
NUDT5	1.79769e+308	0.00312669	0	0	12.3587
MKRN1	1.79769e+308	0.00316631	0	0	12.3314
PEPD (NW_001838492 44878..71571)	1.79769e+308	0.00318689	0	0	12.3178
TACR2	1.79769e+308	0.00318689	0	0	12.3178
G6PD	1.79769e+308	0.00319365	0	0	12.3127
KIAA1486 (NW_001838865 2505..243771)	1.79769e+308	0.00319365	0	0	12.3127
MASTL	1.79769e+308	0.00319526	0	0	12.311
CXCL2	1.79769e+308	0.00320042	0	0	12.3076
PTRF	1.79769e+308	0.00323804	0	0	12.2839
CYP11A1	1.79769e+308	0.0032921	0	0	12.2519
KAT7	1.79769e+308	0.00330427	0	0	12.2435
ALPK2	1.79769e+308	0.00333574	0	0	12.225
SERPINB12	1.79769e+308	0.00334937	0	0	12.2167
HEXA	1.79769e+308	0.0033577	0	0	12.2116
CTHRC1	1.79769e+308	0.00338346	0	0	12.1966
DUSP4	1.79769e+308	0.00344525	0	0	12.1617
FAM19A5	1.79769e+308	0.00345235	0	0	12.1568
NPFFR2	1.79769e+308	0.00346015	0	0	12.1518
FAM71E1	1.79769e+308	0.00346726	0	0	12.1468
CXorf64	1.79769e+308	0.00350215	0	0	12.127
OSMR	1.79769e+308	0.0035321	0	0	12.1093
PRR9	1.79769e+308	0.00353441	0	0	12.1073
RTN1	1.79769e+308	0.00367122	0	0	12.029
CLEC4F	1.79769e+308	0.00367933	0	0	12.0241
TFCP2	1.79769e+308	0.00368179	0	0	12.0225
LMX1A	1.79769e+308	0.00370521	0	0	12.0096
LOR	1.79769e+308	0.00374164	0	0	11.9902
TROVE2	1.79769e+308	0.00374164	0	0	11.9902
PRSS38	1.79769e+308	0.00377755	0	0	11.9709
FAM127B	1.79769e+308	0.00384389	0	0	11.9325
PROCA1	1.79769e+308	0.00384389	0	0	11.9325
CBX2	1.79769e+308	0.0038781	0	0	11.9134
CCL8	1.79769e+308	0.00389489	0	0	11.9039
MID1IP1	1.79769e+308	0.00389489	0	0	11.9039
PPIC	1.79769e+308	0.00389489	0	0	11.9039
STXBP3	1.79769e+308	0.0039225	0	0	11.8896
SUN5	1.79769e+308	0.00393095	0	0	11.8849
CHRNE	1.79769e+308	0.00393862	0	0	11.8801
LOC401097	1.79769e+308	0.00393862	0	0	11.8801
RABGAP1	1.79769e+308	0.00393862	0	0	11.8801
KBTBD4	1.79769e+308	0.00395557	0	0	11.8707
CBLN4	1.79769e+308	0.00396485	0	0	11.8659
NAP1L4	1.79769e+308	0.0040584	0	0	11.8188
SHMT1	1.79769e+308	0.00406784	0	0	11.8141
AGPAT9	1.79769e+308	0.00422823	0	0	11.7396
MLKL	1.79769e+308	0.00424762	0	0	11.7303
HTR1A	1.79769e+308	0.0042565	0	0	11.7257
BLCAP	1.79769e+308	0.00429281	0	0	11.7072
BRMS1L	1.79769e+308	0.00429281	0	0	11.7072
CYP2C18	1.79769e+308	0.00432237	0	0	11.6934
AQP5	1.79769e+308	0.00433049	0	0	11.6888
BRIX1	1.79769e+308	0.00433049	0	0	11.6888
TMUB2	1.79769e+308	0.00433776	0	0	11.6842
ZNF32	1.79769e+308	0.00444774	0	0	11.634
FSTL1	1.79769e+308	0.00446777	0	0	11.6249
SLC22A13	1.79769e+308	0.00446777	0	0	11.6249
FCN1	1.79769e+308	0.00452465	0	0	11.5977
SHISA8	1.79769e+308	0.00452465	0	0	11.5977
M6PR	1.79769e+308	0.00453477	0	0	11.5932
C17orf46	1.79769e+308	0.00454312	0	0	11.5887
CCNT1	1.79769e+308	0.00454312	0	0	11.5887
FEM1A	1.79769e+308	0.00455604	0	0	11.5827
TBX21	1.79769e+308	0.00460057	0	0	11.5617
KCNE1L	1.79769e+308	0.00462013	0	0	11.5527
SPSB2	1.79769e+308	0.00462013	0	0	11.5527
UBXN1	1.79769e+308	0.00463882	0	0	11.5437
PLLP	1.79769e+308	0.00465756	0	0	11.5348
SELE	1.79769e+308	0.00468951	0	0	11.5199
SLC3A2	1.79769e+308	0.00469518	0	0	11.5169
KCTD8	1.79769e+308	0.00478605	0	0	11.477
CDR1	1.79769e+308	0.00483669	0	0	11.4549
PMVK	1.79769e+308	0.00483669	0	0	11.4549
GPR17	1.79769e+308	0.00484723	0	0	11.4505
ADAM7	1.79769e+308	0.0048559	0	0	11.4461
TUBD1	1.79769e+308	0.00487516	0	0	11.4373
VPS33A	1.79769e+308	0.00488386	0	0	11.4329
RNF121	1.79769e+308	0.00489447	0	0	11.4285
CEP89	1.79769e+308	0.00490414	0	0	11.4241
MIP	1.79769e+308	0.00493417	0	0	11.411
MRPL45 (NW_001838435 3276883..3301810)	1.79769e+308	0.00495457	0	0	11.4022
PLEKHO1	1.79769e+308	0.00499746	0	0	11.3848
PSMD6	1.79769e+308	0.00501512	0	0	11.3761
RBM47	1.79769e+308	0.00507802	0	0	11.3522
FAM26D	1.79769e+308	0.005081	0	0	11.35
GLS2	1.79769e+308	0.00509089	0	0	11.3457
STEAP1	1.79769e+308	0.00512161	0	0	11.3327
STMN4	1.79769e+308	0.00514347	0	0	11.3241
C3orf38	1.79769e+308	0.00517736	0	0	11.3112
PILRA	1.79769e+308	0.00518836	0	0	11.3069
C11orf48	1.79769e+308	0.0052779	0	0	11.2726
CACNG1	1.79769e+308	0.0052779	0	0	11.2726
PDC	1.79769e+308	0.00536943	0	0	11.2386
C2orf27B	1.79769e+308	0.00538679	0	0	11.2301
HDAC2	1.79769e+308	0.00551307	0	0	11.1828
PSMD4	1.79769e+308	0.00554598	0	0	11.1711
C1R (NW_001838051 470..7058)	1.79769e+308	0.00556896	0	0	11.1627
NAA20	1.79769e+308	0.00556896	0	0	11.1627
GBX2	1.79769e+308	0.0056151	0	0	11.146
SIX1	1.79769e+308	0.00578913	0	0	11.0837
C15orf59	1.79769e+308	0.00582455	0	0	11.0713
ZNF567	1.79769e+308	0.00583528	0	0	11.0672
LOC441239	1.79769e+308	0.00584602	0	0	11.0631
ACBD4	1.79769e+308	0.00585676	0	0	11.059
MAGEC3	1.79769e+308	0.00585676	0	0	11.059
TMEM187	1.79769e+308	0.00586864	0	0	11.0549
SASH3	1.79769e+308	0.00588053	0	0	11.0508
KCNJ2	1.79769e+308	0.0058902	0	0	11.0467
BIRC5	1.79769e+308	0.00589988	0	0	11.0426
EAPP	1.79769e+308	0.0059118	0	0	11.0385
C15orf58	1.79769e+308	0.00598709	0	0	11.014
B3GNT9	1.79769e+308	0.00602096	0	0	11.0018
PIGY	1.79769e+308	0.0060319	0	0	10.9977
CPOX	1.79769e+308	0.00614243	0	0	10.9612
LOC375190	1.79769e+308	0.00615466	0	0	10.9572
MRPL1	1.79769e+308	0.00617799	0	0	10.9491
FBXO28	1.79769e+308	0.00626421	0	0	10.921
CCNE2	1.79769e+308	0.00628779	0	0	10.913
GNAT2	1.79769e+308	0.00632505	0	0	10.901
SDHD	1.79769e+308	0.00632505	0	0	10.901
ZNF225	1.79769e+308	0.00633512	0	0	10.897
C13orf34	1.79769e+308	0.00635886	0	0	10.889
HOXB7	1.79769e+308	0.00637134	0	0	10.8851
BTNL2	1.79769e+308	0.00639516	0	0	10.8771
WTIP	1.79769e+308	0.00642145	0	0	10.8692
WFDC13	1.79769e+308	0.00649462	0	0	10.8454
CLNS1A	1.79769e+308	0.00651749	0	0	10.8375
TMED10	1.79769e+308	0.00674607	0	0	10.7695
FAM204A	1.79769e+308	0.00677641	0	0	10.7591
EDNRA	1.79769e+308	0.0067916	0	0	10.7539
ITGB7	1.79769e+308	0.00684147	0	0	10.7397
C2orf66	1.79769e+308	0.00685325	0	0	10.7358
IFT74	1.79769e+308	0.00687812	0	0	10.7281
TACC3	1.79769e+308	0.00699004	0	0	10.6934
DHRS7	1.79769e+308	0.00700326	0	0	10.6896
PCDH19	1.79769e+308	0.00701443	0	0	10.6863
KIAA1704	1.79769e+308	0.00702714	0	0	10.6819
PRRG2	1.79769e+308	0.00702714	0	0	10.6819
TAF3	1.79769e+308	0.00707766	0	0	10.6666
EGF	1.79769e+308	0.00709831	0	0	10.6609
USP26	1.79769e+308	0.00712839	0	0	10.6513
XKRX	1.79769e+308	0.00715383	0	0	10.6437
WDR13	1.79769e+308	0.00726285	0	0	10.6133
TGFBI	1.79769e+308	0.00727638	0	0	10.6095
ADRM1	1.79769e+308	0.00734425	0	0	10.5907
MTERFD1	1.79769e+308	0.00736605	0	0	10.5831
ZSCAN20	1.79769e+308	0.00736605	0	0	10.5831
ACTL7B	1.79769e+308	0.00741797	0	0	10.5681
IL1F10	1.79769e+308	0.00755006	0	0	10.5307
SNTG2 (NW_001838758 947237..1264560)	1.79769e+308	0.00755006	0	0	10.5307
SLC26A5	1.79769e+308	0.00766121	0	0	10.501
WASF2	1.79769e+308	0.00767863	0	0	10.4954
NRM	1.79769e+308	0.00771148	0	0	10.4862
GTPBP3	1.79769e+308	0.00772549	0	0	10.4825
METTL21B	1.79769e+308	0.0077381	0	0	10.4788
OFCC1	1.79769e+308	0.0077381	0	0	10.4788
GTF3C1	1.79769e+308	0.00777717	0	0	10.4685
DKK3	1.79769e+308	0.00777742	0	0	10.4677
ZMAT1	1.79769e+308	0.00777742	0	0	10.4677
PDE1A	1.79769e+308	0.0078056	0	0	10.4604
TNFAIP6	1.79769e+308	0.00781828	0	0	10.4567
DLX5	1.79769e+308	0.00787487	0	0	10.442
SLC30A10	1.79769e+308	0.00792736	0	0	10.4274
OS9	1.79769e+308	0.00800017	0	0	10.4092
CXorf30	1.79769e+308	0.0080546	0	0	10.3946
ARNTL	1.79769e+308	0.00810775	0	0	10.3801
DNAJC9	1.79769e+308	0.00820608	0	0	10.3548
KLK9	1.79769e+308	0.00823216	0	0	10.3476
SPRED3	1.79769e+308	0.00826129	0	0	10.3404
CLCNKB	1.79769e+308	0.00838855	0	0	10.3082
FAM104A	1.79769e+308	0.00840022	0	0	10.3046
ARV1	1.79769e+308	0.00843121	0	0	10.2975
PROCR	1.79769e+308	0.00858415	0	0	10.262
TAF12	1.79769e+308	0.00861556	0	0	10.2549
PSMB5	1.79769e+308	0.00870393	0	0	10.2338
GPSM3	1.79769e+308	0.00876418	0	0	10.2197
SUCLG1	1.79769e+308	0.00879281	0	0	10.2127
FAM89B	1.79769e+308	0.0088199	0	0	10.2057
NOP14	1.79769e+308	0.00885022	0	0	10.1987
RUFY1	1.79769e+308	0.00888061	0	0	10.1917
PPP4R2	1.79769e+308	0.00893995	0	0	10.1778
ZNF410	1.79769e+308	0.00895523	0	0	10.1743
CCDC24	1.79769e+308	0.0089689	0	0	10.1708
EZH2	1.79769e+308	0.0089689	0	0	10.1708
CHRM4	1.79769e+308	0.00909011	0	0	10.1431
IPPK	1.79769e+308	0.00909011	0	0	10.1431
TMEM69	1.79769e+308	0.00921556	0	0	10.1155
ZACN	1.79769e+308	0.0092795	0	0	10.1018
RGR	1.79769e+308	0.0093437	0	0	10.0881
DDX4	1.79769e+308	0.0095396	0	0	10.0472
CHRM2	1.79769e+308	0.00968466	0	0	10.0167
DNAL4	1.79769e+308	0.00973038	0	0	10.0066
SKOR2	1.79769e+308	0.0100076	0	0	9.94977
YTHDF1	1.79769e+308	0.0100076	0	0	9.94977
MRC2	1.79769e+308	0.0100149	0	0	9.94811
BARHL2	1.79769e+308	0.0100222	0	0	9.94644
CDK15	1.79769e+308	0.0100857	0	0	9.93317
MEGF9	1.79769e+308	0.0101276	0	0	9.92488
LAMB3	1.79769e+308	0.0101288	0	0	9.92433
FBXL2	1.79769e+308	0.0102172	0	0	9.90671
SYT7	1.79769e+308	0.0102276	0	0	9.90451
AKAP4	1.79769e+308	0.0102484	0	0	9.90012
UBTD2	1.79769e+308	0.0102484	0	0	9.90012
CYP19A1	1.79769e+308	0.0102882	0	0	9.89135
ZNF558	1.79769e+308	0.0103792	0	0	9.87384
TEKT2	1.79769e+308	0.0104477	0	0	9.86076
SH3PXD2B	1.79769e+308	0.0104589	0	0	9.85814
SCAND1	1.79769e+308	0.0104756	0	0	9.85423
ARFGAP2	1.79769e+308	0.0105109	0	0	9.8477
ZNF645	1.79769e+308	0.0106474	0	0	9.8217
CDK7	1.79769e+308	0.0107169	0	0	9.80876
GBP3	1.79769e+308	0.0108189	0	0	9.7894
C12orf24	1.79769e+308	0.0108511	0	0	9.78296
ZNF486	1.79769e+308	0.0108852	0	0	9.77653
ICAM2	1.79769e+308	0.0109175	0	0	9.77011
TCEB3B	1.79769e+308	0.0109175	0	0	9.77011
BTBD18	1.79769e+308	0.0109499	0	0	9.7637
GPR4	1.79769e+308	0.0109499	0	0	9.7637
ENO3	1.79769e+308	0.0110394	0	0	9.74452
OXSM	1.79769e+308	0.0110394	0	0	9.74452
PPHLN1	1.79769e+308	0.011072	0	0	9.73814
CD2	1.79769e+308	0.0111738	0	0	9.71906
DENR	1.79769e+308	0.0111911	0	0	9.71589
C18orf55	1.79769e+308	0.0112741	0	0	9.70005
CCDC36	1.79769e+308	0.0112741	0	0	9.70005
FDXACB1	1.79769e+308	0.0112741	0	0	9.70005
ERP27	1.79769e+308	0.0113459	0	0	9.68742
GTF2E2	1.79769e+308	0.0113459	0	0	9.68742
TIFA	1.79769e+308	0.0113634	0	0	9.68427
CDH9	1.79769e+308	0.0113944	0	0	9.67797
FAM126A	1.79769e+308	0.0114022	0	0	9.6764
EPHB1	1.79769e+308	0.0114371	0	0	9.66854
LOC100653103	1.79769e+308	0.0114371	0	0	9.66854
SLC2A7	1.79769e+308	0.0114371	0	0	9.66854
C19orf46	1.79769e+308	0.0115094	0	0	9.65599
PLEKHA4	1.79769e+308	0.0115224	0	0	9.65286
HLA-DQA1	1.79769e+308	0.0115326	0	0	9.64973
TRIM22	1.79769e+308	0.0116584	0	0	9.62788
CD151	1.79769e+308	0.0116701	0	0	9.62476
TUBA3D	1.79769e+308	0.0116701	0	0	9.62476
CLCN1	1.79769e+308	0.0116878	0	0	9.62165
SNAPC3	1.79769e+308	0.0117193	0	0	9.61543
NR4A3	1.79769e+308	0.0117608	0	0	9.60767
MC1R	1.79769e+308	0.0117844	0	0	9.60302
NDUFA5	1.79769e+308	0.0117982	0	0	9.59992
OVOL2	1.79769e+308	0.011965	0	0	9.56906
P2RY1	1.79769e+308	0.011965	0	0	9.56906
QPRT	1.79769e+308	0.011965	0	0	9.56906
KDELR1	1.79769e+308	0.012001	0	0	9.56291
AMN	1.79769e+308	0.012037	0	0	9.55676
ZBTB39	1.79769e+308	0.0121253	0	0	9.54144
KLK5	1.79769e+308	0.0122482	0	0	9.52008
RGS13	1.79769e+308	0.0122482	0	0	9.52008
NANOS2	1.79769e+308	0.0123212	0	0	9.50791
TADA3	1.79769e+308	0.0124495	0	0	9.4867
TDRD3	1.79769e+308	0.0124495	0	0	9.4867
ALKBH3	1.79769e+308	0.0124657	0	0	9.48367
VAMP1	1.79769e+308	0.0124841	0	0	9.48065
COPG2	1.79769e+308	0.0125535	0	0	9.46859
C1orf94	1.79769e+308	0.0126373	0	0	9.45355
CSRNP1	1.79769e+308	0.0126373	0	0	9.45355
ZP3	1.79769e+308	0.0126373	0	0	9.45355
TBCCD1	1.79769e+308	0.0126744	0	0	9.44754
TULP3	1.79769e+308	0.0127629	0	0	9.43257
PSMC3	1.79769e+308	0.0128606	0	0	9.41765
MXD3	1.79769e+308	0.0128793	0	0	9.41467
PSMD11	1.79769e+308	0.012898	0	0	9.41169
FAM71E2	1.79769e+308	0.0129333	0	0	9.40574
R3HCC1	1.79769e+308	0.0129333	0	0	9.40574
MYO3B	1.79769e+308	0.0129941	0	0	9.39683
ARHGAP42	1.79769e+308	0.0130129	0	0	9.39386
ARL5A	1.79769e+308	0.0130372	0	0	9.38794
NKAP	1.79769e+308	0.0130372	0	0	9.38794
NR0B1	1.79769e+308	0.0130372	0	0	9.38794
PAAF1	1.79769e+308	0.0130372	0	0	9.38794
PHACTR3	1.79769e+308	0.0130372	0	0	9.38794
TDRD9	1.79769e+308	0.0131318	0	0	9.37217
NGDN	1.79769e+308	0.0131414	0	0	9.3702
B4GALT7	1.79769e+308	0.0131748	0	0	9.36431
LTA	1.79769e+308	0.0132127	0	0	9.35842
SEPT1	1.79769e+308	0.0132127	0	0	9.35842
TGFB3	1.79769e+308	0.0132674	0	0	9.3496
CSF3	1.79769e+308	0.0132841	0	0	9.34666
NGEF	1.79769e+308	0.0133175	0	0	9.34079
SLC31A1	1.79769e+308	0.0133273	0	0	9.33884
ZNF185	1.79769e+308	0.0133894	0	0	9.32908
DSCAM (NW_001838709 322..327280)	1.79769e+308	0.0134156	0	0	9.32518
ZNF391	1.79769e+308	0.013423	0	0	9.32323
DDX10	1.79769e+308	0.0134376	0	0	9.32031
ZNF598	1.79769e+308	0.0134736	0	0	9.31448
TXLNA	1.79769e+308	0.0135191	0	0	9.30768
DUX4 (NW_001841145 4618..91285)	1.79769e+308	0.0135672	0	0	9.29993
SPDYE1	1.79769e+308	0.0136442	0	0	9.28832
NCOA5	1.79769e+308	0.0137431	0	0	9.27384
SDS	1.79769e+308	0.0137578	0	0	9.27095
VPS37D	1.79769e+308	0.0137578	0	0	9.27095
HMGCL	1.79769e+308	0.0138813	0	0	9.25366
PSG11	1.79769e+308	0.0139156	0	0	9.24791
TEKT5	1.79769e+308	0.0139156	0	0	9.24791
RSBN1L	1.79769e+308	0.0139522	0	0	9.24216
NRK	1.79769e+308	0.0139832	0	0	9.23757
ATP6V1G1	1.79769e+308	0.0139832	0	0	9.23643
HAGH	1.79769e+308	0.0139832	0	0	9.23643
THBS4	1.79769e+308	0.013999	0	0	9.23356
VPS11	1.79769e+308	0.013999	0	0	9.23356
CNKSR3	1.79769e+308	0.0140945	0	0	9.21926
RBM14-RBM4	1.79769e+308	0.0140945	0	0	9.21926
SGK196	1.79769e+308	0.0141338	0	0	9.21355
PHF15	1.79769e+308	0.0141904	0	0	9.205
MDFI	1.79769e+308	0.0142077	0	0	9.20215
TDRD12	1.79769e+308	0.0142077	0	0	9.20215
EVX2	1.79769e+308	0.0142423	0	0	9.19647
RHCE	1.79769e+308	0.0142423	0	0	9.19647
ZNF23	1.79769e+308	0.0143831	0	0	9.17662
CAPN8 (NW_001838539 232004..288777)	1.79769e+308	0.0144402	0	0	9.16813
CHST5	1.79769e+308	0.0145148	0	0	9.15685
SEPT10	1.79769e+308	0.0145148	0	0	9.15685
KIAA1430	1.79769e+308	0.0145498	0	0	9.15122
FETUB	1.79769e+308	0.0145897	0	0	9.14559
C16orf59	1.79769e+308	0.0146248	0	0	9.13998
CRLF1	1.79769e+308	0.0146623	0	0	9.13437
AIMP1	1.79769e+308	0.0147249	0	0	9.12596
C1orf52	1.79769e+308	0.0147802	0	0	9.11757
ZNF75D	1.79769e+308	0.0148657	0	0	9.10641
COMMD5	1.79769e+308	0.0149085	0	0	9.10085
TEX10	1.79769e+308	0.0149894	0	0	9.08973
SLC22A5	1.79769e+308	0.0150756	0	0	9.07863
DNAJC19	1.79769e+308	0.0151569	0	0	9.06757
GMPPB	1.79769e+308	0.0151977	0	0	9.06205
INTS5	1.79769e+308	0.0152156	0	0	9.05929
BHLHE41	1.79769e+308	0.0152743	0	0	9.05102
EXOSC9	1.79769e+308	0.0152743	0	0	9.05102
PRICKLE4	1.79769e+308	0.0153563	0	0	9.04003
MMP27	1.79769e+308	0.0153922	0	0	9.03454
AGER	1.79769e+308	0.015477	0	0	9.02358
KRTAP24-1	1.79769e+308	0.0155156	0	0	9.01811
SRSF5	1.79769e+308	0.0155543	0	0	9.01265
DOK3	1.79769e+308	0.0155724	0	0	9.00992
HOXA5	1.79769e+308	0.015681	0	0	8.9963
SFRP5	1.79769e+308	0.0157199	0	0	8.99087
RPP38	1.79769e+308	0.0157588	0	0	8.98544
QRICH1	1.79769e+308	0.0158186	0	0	8.9773
TMEM144	1.79769e+308	0.0158603	0	0	8.97189
SMARCAL1	1.79769e+308	0.0159229	0	0	8.96378
CCDC97	1.79769e+308	0.0159621	0	0	8.95839
TNFSF9	1.79769e+308	0.0160013	0	0	8.953
BCS1L	1.79769e+308	0.0160432	0	0	8.94761
COX6B2	1.79769e+308	0.0160432	0	0	8.94761
ARHGEF1	1.79769e+308	0.0160852	0	0	8.94224
CLCN4	1.79769e+308	0.0161732	0	0	8.93016
ATP6V0A4	1.79769e+308	0.0161824	0	0	8.92882
CYP2E1	1.79769e+308	0.0162008	0	0	8.92614
WRB	1.79769e+308	0.0162403	0	0	8.92079
FAM18A	1.79769e+308	0.0163063	0	0	8.91278
C4orf44	1.79769e+308	0.0163194	0	0	8.91011
LINGO3	1.79769e+308	0.0163194	0	0	8.91011
VMAC	1.79769e+308	0.0163194	0	0	8.91011
ACTL8	1.79769e+308	0.0164068	0	0	8.89945
SLC46A3	1.79769e+308	0.016428	0	0	8.89679
FBXW12	1.79769e+308	0.0164836	0	0	8.88882
IFT52	1.79769e+308	0.0165235	0	0	8.88351
C19orf45	1.79769e+308	0.0167024	0	0	8.86235
SLC9A7	1.79769e+308	0.0167909	0	0	8.8518
CCKAR	1.79769e+308	0.0168311	0	0	8.84654
C12orf61	1.79769e+308	0.0169088	0	0	8.83603
MAGEA1	1.79769e+308	0.0169088	0	0	8.83603
MAP6	1.79769e+308	0.0172693	0	0	8.79426
ZNF622	1.79769e+308	0.0172693	0	0	8.79426
PYCR2	1.79769e+308	0.0173044	0	0	8.78906
CHAD	1.79769e+308	0.0173746	0	0	8.77869
LOC100287837	1.79769e+308	0.0173746	0	0	8.77869
TRAT1	1.79769e+308	0.0173746	0	0	8.77869
ZNF157	1.79769e+308	0.0173746	0	0	8.77869
SIGLEC10	1.79769e+308	0.0174649	0	0	8.76835
VEPH1	1.79769e+308	0.0175993	0	0	8.75287
WNT6	1.79769e+308	0.0175993	0	0	8.75287
SMARCB1	1.79769e+308	0.0177343	0	0	8.73745
SLMO1	1.79769e+308	0.0177756	0	0	8.73232
PIP5KL1	1.79769e+308	0.0179614	0	0	8.71187
IFIH1	1.79769e+308	0.0180785	0	0	8.69914
KIAA1009	1.79769e+308	0.0181732	0	0	8.68814
HMGB1	1.79769e+308	0.0182065	0	0	8.68391
PLN	1.79769e+308	0.0182289	0	0	8.68138
FBXO2	1.79769e+308	0.0182648	0	0	8.67632
GTF2H4	1.79769e+308	0.0183066	0	0	8.67126
PDGFB	1.79769e+308	0.0183066	0	0	8.67126
RGP1	1.79769e+308	0.0183455	0	0	8.66621
GCNT4	1.79769e+308	0.0183844	0	0	8.66117
KLRC1	1.79769e+308	0.0184264	0	0	8.65613
MLLT3	1.79769e+308	0.0184459	0	0	8.65361
LOC253044	1.79769e+308	0.0184654	0	0	8.65109
TSSC1	1.79769e+308	0.0185104	0	0	8.64607
C9orf131	1.79769e+308	0.0185329	0	0	8.64356
YPEL4	1.79769e+308	0.0185525	0	0	8.64105
IFI44	1.79769e+308	0.0187273	0	0	8.62102
STX17	1.79769e+308	0.0187628	0	0	8.61728
RFX8	1.79769e+308	0.0188543	0	0	8.60606
TRIM4	1.79769e+308	0.0188543	0	0	8.60606
DCTN2	1.79769e+308	0.0189423	0	0	8.59612
CHCHD7	1.79769e+308	0.0189817	0	0	8.59116
LOC100505906	1.79769e+308	0.0191218	0	0	8.5763
MKI67IP	1.79769e+308	0.0192687	0	0	8.5615
CA14	1.79769e+308	0.0193115	0	0	8.55657
UGT3A1	1.79769e+308	0.0194497	0	0	8.54184
PUS7	1.79769e+308	0.0194697	0	0	8.53939
TNFSF4	1.79769e+308	0.0196611	0	0	8.51983
AP1M2	1.79769e+308	0.0197804	0	0	8.50765
CLEC12B	1.79769e+308	0.019827	0	0	8.50279
SUB1	1.79769e+308	0.0199904	0	0	8.48582
ACTR6	1.79769e+308	0.0200606	0	0	8.47857
HERC5	1.79769e+308	0.0201342	0	0	8.47132
HHEX	1.79769e+308	0.0202485	0	0	8.45928
MMP10	1.79769e+308	0.0202485	0	0	8.45928
ADAM33	1.79769e+308	0.0202721	0	0	8.45688
PIWIL1	1.79769e+308	0.0203224	0	0	8.45208
ZNF878	1.79769e+308	0.0203932	0	0	8.44488
GPN3	1.79769e+308	0.0204845	0	0	8.43531
MRPL3	1.79769e+308	0.0204845	0	0	8.43531
RUVBL1	1.79769e+308	0.0204845	0	0	8.43531
LOC647589	1.79769e+308	0.0205221	0	0	8.43053
MOB2	1.79769e+308	0.0206169	0	0	8.42099
NKD2	1.79769e+308	0.0206611	0	0	8.41622
CDK8	1.79769e+308	0.0207087	0	0	8.41147
DOK2	1.79769e+308	0.0207563	0	0	8.40671
RPS6KB2	1.79769e+308	0.0207563	0	0	8.40671
LRRC24	1.79769e+308	0.020855	0	0	8.39722
ZMYND10	1.79769e+308	0.0208994	0	0	8.39249
C12orf52	1.79769e+308	0.0209951	0	0	8.38303
MTERFD3	1.79769e+308	0.0209951	0	0	8.38303
ABHD16B	1.79769e+308	0.0210843	0	0	8.3736
FAM55B	1.79769e+308	0.0211323	0	0	8.36889
HOXA2	1.79769e+308	0.0211323	0	0	8.36889
CYFIP2	1.79769e+308	0.0212083	0	0	8.35948
LRG1	1.79769e+308	0.0212083	0	0	8.35948
PROC	1.79769e+308	0.0212083	0	0	8.35948
MBL2	1.79769e+308	0.0214388	0	0	8.3384
DENND1A	1.79769e+308	0.0215865	0	0	8.32363
FAM134B	1.79769e+308	0.0216918	0	0	8.31278
FAM71D	1.79769e+308	0.0216918	0	0	8.31278
ALDH4A1	1.79769e+308	0.0217127	0	0	8.31046
AAMP	1.79769e+308	0.0218414	0	0	8.29887
LOC100653301	1.79769e+308	0.0218623	0	0	8.29656
STX5	1.79769e+308	0.0218867	0	0	8.29425
FLJ37396	1.79769e+308	0.0219286	0	0	8.28963
TMEM98	1.79769e+308	0.0219286	0	0	8.28963
CNOT4	1.79769e+308	0.0219775	0	0	8.28501
NUPL2	1.79769e+308	0.022023	0	0	8.2804
GEMIN5	1.79769e+308	0.022231	0	0	8.26048
ARL4C	1.79769e+308	0.022293	0	0	8.25514
MX1	1.79769e+308	0.0223036	0	0	8.25285
SAMD13	1.79769e+308	0.0223036	0	0	8.25285
TRIM26	1.79769e+308	0.0223036	0	0	8.25285
DKK1	1.79769e+308	0.0224057	0	0	8.2437
THPO	1.79769e+308	0.0224057	0	0	8.2437
RRP1	1.79769e+308	0.0226	0	0	8.22547
CTSK	1.79769e+308	0.0226495	0	0	8.22093
PRSS54	1.79769e+308	0.0226495	0	0	8.22093
TSKS	1.79769e+308	0.0227417	0	0	8.21186
NEFM	1.79769e+308	0.0228163	0	0	8.20506
ZADH2	1.79769e+308	0.0228222	0	0	8.20431
RBFOX2	1.79769e+308	0.0229016	0	0	8.19715
DDX47	1.79769e+308	0.0229836	0	0	8.18926
TUBG2	1.79769e+308	0.0230299	0	0	8.18475
ACAA1	1.79769e+308	0.0230835	0	0	8.18025
ACCSL	1.79769e+308	0.0231263	0	0	8.17576
ZNF358	1.79769e+308	0.0231728	0	0	8.17127
TMEM236	1.79769e+308	0.0232193	0	0	8.16678
CDH11	1.79769e+308	0.0233233	0	0	8.15783
SYT5	1.79769e+308	0.0233772	0	0	8.15336
PHB	1.79769e+308	0.0234276	0	0	8.14889
RNF170	1.79769e+308	0.0234587	0	0	8.14592
CPSF4	1.79769e+308	0.0234706	0	0	8.14443
TBC1D9	1.79769e+308	0.0235596	0	0	8.13701
DOK5	1.79769e+308	0.0238135	0	0	8.11335
RPIA	1.79769e+308	0.0238135	0	0	8.11335
VPS26B	1.79769e+308	0.0238389	0	0	8.11114
ZNF193	1.79769e+308	0.0239076	0	0	8.10451
MUC1	1.79769e+308	0.0240093	0	0	8.09569
KRT15	1.79769e+308	0.0241038	0	0	8.08689
COQ6	1.79769e+308	0.0241585	0	0	8.0825
ELMO2	1.79769e+308	0.0241766	0	0	8.08031
XYLB	1.79769e+308	0.0241766	0	0	8.08031
NPY5R	1.79769e+308	0.0242495	0	0	8.07373
FAM171A2	1.79769e+308	0.0242856	0	0	8.06935
CLP1	1.79769e+308	0.0243767	0	0	8.06061
SIGIRR	1.79769e+308	0.0244242	0	0	8.05624
DDB2	1.79769e+308	0.0244717	0	0	8.05188
PNMAL1	1.79769e+308	0.0245782	0	0	8.04318
CYP2J2	1.79769e+308	0.0247766	0	0	8.02583
WDR73	1.79769e+308	0.0248244	0	0	8.0215
NAPA	1.79769e+308	0.0250793	0	0	7.99994
PDE1B	1.79769e+308	0.0251793	0	0	7.99134
ASZ1	1.79769e+308	0.0253315	0	0	7.97849
APOBR	1.79769e+308	0.0254058	0	0	7.97208
RAB9B	1.79769e+308	0.0254541	0	0	7.96781
PCID2	1.79769e+308	0.0254763	0	0	7.96568
MAP2K6	1.79769e+308	0.0255325	0	0	7.96141
EIF2B1	1.79769e+308	0.025573	0	0	7.95716
DDN	1.79769e+308	0.0256699	0	0	7.94865
SPZ1	1.79769e+308	0.0256699	0	0	7.94865
TCEB3C	1.79769e+308	0.0259166	0	0	7.92748
RDH12	1.79769e+308	0.0259692	0	0	7.92326
EFCAB8 (NW_001838664 3393564..3446023)	1.79769e+308	0.0260219	0	0	7.91904
PRRT3	1.79769e+308	0.0260482	0	0	7.91694
DUOXA1	1.79769e+308	0.0260746	0	0	7.91483
TMEM212	1.79769e+308	0.0261273	0	0	7.91062
PRDM11	1.79769e+308	0.0262939	0	0	7.89803
CSNK1D	1.79769e+308	0.0263204	0	0	7.89593
GPT	1.79769e+308	0.0263798	0	0	7.88965
HOXD9	1.79769e+308	0.0263798	0	0	7.88965
UTP18	1.79769e+308	0.0263798	0	0	7.88965
TMCO6	1.79769e+308	0.0265384	0	0	7.87712
CEBPB	1.79769e+308	0.0266986	0	0	7.86463
DDX31	1.79769e+308	0.0267398	0	0	7.86048
HAPLN3	1.79769e+308	0.0267398	0	0	7.86048
PSMB11	1.79769e+308	0.026789	0	0	7.85633
SPDEF	1.79769e+308	0.026789	0	0	7.85633
HORMAD2	1.79769e+308	0.0268424	0	0	7.85218
TBC1D1	1.79769e+308	0.0268794	0	0	7.84942
MRPS35	1.79769e+308	0.0269493	0	0	7.8439
NRBF2	1.79769e+308	0.0269493	0	0	7.8439
GSS	1.79769e+308	0.0271181	0	0	7.83152
SCYL2	1.79769e+308	0.0273061	0	0	7.81712
GPM6A	1.79769e+308	0.0273289	0	0	7.81506
GUCA1A	1.79769e+308	0.0273289	0	0	7.81506
RHOJ	1.79769e+308	0.0273786	0	0	7.81096
TTYH1	1.79769e+308	0.0274781	0	0	7.80277
LPCAT4	1.79769e+308	0.0275279	0	0	7.79868
GFRAL	1.79769e+308	0.027586	0	0	7.79459
KRT81	1.79769e+308	0.0276359	0	0	7.79051
PFKM	1.79769e+308	0.0277171	0	0	7.7844
C1orf124	1.79769e+308	0.0281582	0	0	7.75398
SEC23A	1.79769e+308	0.0282442	0	0	7.74792
COX15	1.79769e+308	0.028342	0	0	7.74087
ARHGEF9	1.79769e+308	0.028402	0	0	7.73651
HNRNPA1	1.79769e+308	0.0284904	0	0	7.72981
ITGAE	1.79769e+308	0.0287838	0	0	7.70779
GDAP2	1.79769e+308	0.0289131	0	0	7.69861
PHLDB1	1.79769e+308	0.029015	0	0	7.69119
CLEC3A	1.79769e+308	0.0290319	0	0	7.68986
FSHB	1.79769e+308	0.0290872	0	0	7.68589
HMGN2	1.79769e+308	0.0291338	0	0	7.68192
DYNC2LI1	1.79769e+308	0.0291891	0	0	7.67796
CBX7	1.79769e+308	0.0292911	0	0	7.67004
NFIL3	1.79769e+308	0.0293466	0	0	7.66609
HPD	1.79769e+308	0.0294065	0	0	7.66214
ZNF792	1.79769e+308	0.0295308	0	0	7.65426
ASPG	1.79769e+308	0.0296422	0	0	7.64639
CCNE1	1.79769e+308	0.0296935	0	0	7.64247
GBGT1	1.79769e+308	0.0298095	0	0	7.63462
GDAP1	1.79769e+308	0.0298375	0	0	7.63267
TUBG1	1.79769e+308	0.0299213	0	0	7.6268
HS3ST2	1.79769e+308	0.0299728	0	0	7.62289
C3AR1	1.79769e+308	0.0301589	0	0	7.61119
BCL11B	1.79769e+308	0.0302876	0	0	7.60244
XKR4	1.79769e+308	0.0302994	0	0	7.60147
GTF3C2	1.79769e+308	0.0304446	0	0	7.59178
ZBTB32	1.79769e+308	0.0304446	0	0	7.59178
TXNRD2	1.79769e+308	0.0306275	0	0	7.58017
PRKAG1	1.79769e+308	0.0306841	0	0	7.57631
YIPF4	1.79769e+308	0.0307269	0	0	7.57246
SYTL1	1.79769e+308	0.0307744	0	0	7.56861
PLDN	1.79769e+308	0.0310525	0	0	7.55132
NADKD1	1.79769e+308	0.0310763	0	0	7.54941
ZNF653	1.79769e+308	0.031375	0	0	7.5303
ABAT	1.79769e+308	0.0314321	0	0	7.5265
ETV3L	1.79769e+308	0.0314321	0	0	7.5265
DCBLD1	1.79769e+308	0.0315557	0	0	7.51889
ADH4	1.79769e+308	0.031613	0	0	7.51509
KPNA2	1.79769e+308	0.031613	0	0	7.51509
ARG2	1.79769e+308	0.0316703	0	0	7.5113
ANKRD33	1.79769e+308	0.0319045	0	0	7.49616
EFNA2	1.79769e+308	0.0320676	0	0	7.48485
OAS1	1.79769e+308	0.0321205	0	0	7.48109
PRICKLE3	1.79769e+308	0.0321687	0	0	7.47733
MYBPC1	1.79769e+308	0.0324526	0	0	7.45859
HS6ST2	1.79769e+308	0.0324768	0	0	7.45672
ZNF784	1.79769e+308	0.0325057	0	0	7.45485
DNASE2	1.79769e+308	0.0326119	0	0	7.44739
NUDT10	1.79769e+308	0.0327715	0	0	7.43622
SLAMF1	1.79769e+308	0.0327715	0	0	7.43622
OPLAH	1.79769e+308	0.0329798	0	0	7.42324
SNX9	1.79769e+308	0.0332129	0	0	7.40845
ABCB9	1.79769e+308	0.0333346	0	0	7.40109
HMGN5	1.79769e+308	0.0334174	0	0	7.39557
SPATA7	1.79769e+308	0.033476	0	0	7.39189
CLCNKA	1.79769e+308	0.0335296	0	0	7.38822
GPR160	1.79769e+308	0.0335296	0	0	7.38822
SLC30A1	1.79769e+308	0.0337741	0	0	7.37358
NLRP10	1.79769e+308	0.0339066	0	0	7.36628
NADK	1.79769e+308	0.0340144	0	0	7.35899
AADACL3	1.79769e+308	0.0341818	0	0	7.3499
TRAIP	1.79769e+308	0.0342063	0	0	7.34809
CIAO1	1.79769e+308	0.0342897	0	0	7.34265
LRP12	1.79769e+308	0.0343736	0	0	7.33722
SMNDC1	1.79769e+308	0.0344328	0	0	7.3336
CLCN3	1.79769e+308	0.034586	0	0	7.32458
HS3ST3B1	1.79769e+308	0.0346156	0	0	7.32278
LOC100130255	1.79769e+308	0.03468	0	0	7.31917
TRPC1	1.79769e+308	0.0347742	0	0	7.31378
C9orf167	1.79769e+308	0.0347989	0	0	7.31198
PARK2	1.79769e+308	0.0348932	0	0	7.3066
TFAP2D	1.79769e+308	0.0350523	0	0	7.29764
ZFP28	1.79769e+308	0.0353261	0	0	7.28157
TPST2	1.79769e+308	0.0354861	0	0	7.27267
IL20RB	1.79769e+308	0.035546	0	0	7.26912
C14orf80	1.79769e+308	0.0356112	0	0	7.26557
GHR	1.79769e+308	0.0357078	0	0	7.25966
CLEC2B	1.79769e+308	0.0358619	0	0	7.2514
FAM194A	1.79769e+308	0.0359221	0	0	7.24787
MLST8	1.79769e+308	0.0361081	0	0	7.2373
C1QL4	1.79769e+308	0.0366368	0	0	7.20575
TYR	1.79769e+308	0.0366368	0	0	7.20575
L3MBTL3	1.79769e+308	0.0366671	0	0	7.20401
ACD	1.79769e+308	0.0366975	0	0	7.20227
C21orf56	1.79769e+308	0.0367529	0	0	7.19878
C12orf56	1.79769e+308	0.0368691	0	0	7.19182
HOXC13	1.79769e+308	0.0368691	0	0	7.19182
B3GNT1	1.79769e+308	0.0369299	0	0	7.18835
LRIG3	1.79769e+308	0.0370265	0	0	7.18314
IHH	1.79769e+308	0.0370516	0	0	7.18141
TCN2	1.79769e+308	0.0370516	0	0	7.18141
IGDCC4	1.79769e+308	0.0370701	0	0	7.18025
INCENP	1.79769e+308	0.0371018	0	0	7.17795
CISD1	1.79769e+308	0.0371521	0	0	7.17448
KLHL1	1.79769e+308	0.0372023	0	0	7.17103
RNF34	1.79769e+308	0.0372023	0	0	7.17103
TXNDC17	1.79769e+308	0.0372023	0	0	7.17103
RNF44	1.79769e+308	0.0373046	0	0	7.16585
TMPRSS11F	1.79769e+308	0.0373297	0	0	7.16412
OR13A1	1.79769e+308	0.0373908	0	0	7.16067
ARPC4	1.79769e+308	0.0375634	0	0	7.15035
ATIC	1.79769e+308	0.0377634	0	0	7.14006
ZBTB7C	1.79769e+308	0.0378554	0	0	7.13492
CCDC37	1.79769e+308	0.0378698	0	0	7.13321
NODAL	1.79769e+308	0.0378698	0	0	7.13321
DAZAP1	1.79769e+308	0.0379257	0	0	7.12979
LILRB4	1.79769e+308	0.0379257	0	0	7.12979
ACCN3	1.79769e+308	0.0379871	0	0	7.12638
CDC42EP1	1.79769e+308	0.0379871	0	0	7.12638
FURIN	1.79769e+308	0.0381155	0	0	7.11956
DNAJC1	1.79769e+308	0.0381825	0	0	7.11616
GREM2	1.79769e+308	0.0382078	0	0	7.11445
DSPP	1.79769e+308	0.0382386	0	0	7.11275
ZNF699	1.79769e+308	0.0383728	0	0	7.10596
MCOLN1	1.79769e+308	0.0386363	0	0	7.09241
CILP2	1.79769e+308	0.0387347	0	0	7.08735
FCF1	1.79769e+308	0.0388331	0	0	7.08229
BLOC1S2	1.79769e+308	0.0388895	0	0	7.07892
GBA	1.79769e+308	0.0389515	0	0	7.07555
C16orf52	1.79769e+308	0.0389825	0	0	7.07387
EPHB3	1.79769e+308	0.0389968	0	0	7.07219
DAPK3	1.79769e+308	0.0390644	0	0	7.06883
AK8	1.79769e+308	0.0391265	0	0	7.06547
KDELC1	1.79769e+308	0.0391831	0	0	7.06212
GPR3	1.79769e+308	0.0394375	0	0	7.04874
SPRY2	1.79769e+308	0.0394375	0	0	7.04874
AKAP8L	1.79769e+308	0.0396358	0	0	7.03873
TFG	1.79769e+308	0.0396358	0	0	7.03873
KIAA0146	1.79769e+308	0.0397706	0	0	7.03208
SLFN13	1.79769e+308	0.0399155	0	0	7.02461
FAM181A	1.79769e+308	0.0399596	0	0	7.02212
KCTD4	1.79769e+308	0.0399596	0	0	7.02212
IFNGR1	1.79769e+308	0.0400222	0	0	7.01881
RAD54B	1.79769e+308	0.0401219	0	0	7.01385
SLC7A3	1.79769e+308	0.0401419	0	0	7.0122
ZCCHC10	1.79769e+308	0.0401419	0	0	7.0122
C6orf146	1.79769e+308	0.0403301	0	0	7.0023
PABPC1L	1.79769e+308	0.0405758	0	0	6.98914
TXNDC2	1.79769e+308	0.0405758	0	0	6.98914
GNA15	1.79769e+308	0.0407647	0	0	6.97931
STAG3L4	1.79769e+308	0.0409829	0	0	6.9695
AMDHD1	1.79769e+308	0.0410403	0	0	6.96624
PDCD11	1.79769e+308	0.0412067	0	0	6.95755
TFAP4	1.79769e+308	0.0412067	0	0	6.95647
SPATA2	1.79769e+308	0.0413532	0	0	6.94835
ZCCHC12	1.79769e+308	0.0415634	0	0	6.93701
ZNF394	1.79769e+308	0.0415634	0	0	6.93701
KRT4	1.79769e+308	0.0416962	0	0	6.93055
C6orf10	1.79769e+308	0.0417597	0	0	6.92732
LEO1	1.79769e+308	0.0417597	0	0	6.92732
SLC35A3	1.79769e+308	0.0418232	0	0	6.9241
CCBL2	1.79769e+308	0.0420141	0	0	6.91444
IL9R	1.79769e+308	0.0420718	0	0	6.91123
TMEM65	1.79769e+308	0.0420718	0	0	6.91123
CTAGE1	1.79769e+308	0.0423648	0	0	6.89682
HAUS5	1.79769e+308	0.0423648	0	0	6.89682
CCDC7	1.79769e+308	0.0425304	0	0	6.88883
MARVELD2	1.79769e+308	0.0425304	0	0	6.88883
ASB4	1.79769e+308	0.0425765	0	0	6.88565
CFI	1.79769e+308	0.0425765	0	0	6.88565
HIP1R	1.79769e+308	0.0425765	0	0	6.88565
ATP5S	1.79769e+308	0.0427864	0	0	6.8761
PRAMEF13	1.79769e+308	0.0427864	0	0	6.8761
ZSCAN30	1.79769e+308	0.0428125	0	0	6.87451
CHTOP	1.79769e+308	0.0429086	0	0	6.86975
SMAD6	1.79769e+308	0.0429788	0	0	6.86658
KLHL36	1.79769e+308	0.0430951	0	0	6.86025
PLK1	1.79769e+308	0.0430951	0	0	6.86025
DCAKD	1.79769e+308	0.0432818	0	0	6.85077
ADPRHL1	1.79769e+308	0.0433461	0	0	6.84762
HSPA1B	1.79769e+308	0.0433461	0	0	6.84762
KIAA1737	1.79769e+308	0.0433783	0	0	6.84605
LDB3	1.79769e+308	0.043385	0	0	6.84552
CCDC27	1.79769e+308	0.0434044	0	0	6.84447
GPR125	1.79769e+308	0.0435393	0	0	6.83818
PI4KB	1.79769e+308	0.0435915	0	0	6.83504
RALBP1	1.79769e+308	0.0435915	0	0	6.83504
TERF2IP	1.79769e+308	0.0435915	0	0	6.83504
PKP4	1.79769e+308	0.043676	0	0	6.83033
PRDM16	1.79769e+308	0.0437928	0	0	6.82407
METTL2B	1.79769e+308	0.0438835	0	0	6.81938
SULT1A1	1.79769e+308	0.0438835	0	0	6.81938
BCL2L14	1.79769e+308	0.0440066	0	0	6.81313
DHX34	1.79769e+308	0.044142	0	0	6.8069
PSAT1	1.79769e+308	0.0442899	0	0	6.80068
C9orf72	1.79769e+308	0.0443424	0	0	6.79757
RFX4	1.79769e+308	0.0444072	0	0	6.79447
FAM200B	1.79769e+308	0.0445817	0	0	6.78672
TCERG1L	1.79769e+308	0.0445956	0	0	6.78517
WDR16	1.79769e+308	0.0445956	0	0	6.78517
C6orf145	1.79769e+308	0.0446543	0	0	6.78208
GNA12	1.79769e+308	0.0446543	0	0	6.78208
NIPAL1	1.79769e+308	0.0446543	0	0	6.78208
LARP1	1.79769e+308	0.0449258	0	0	6.77076
PUS7L	1.79769e+308	0.0450431	0	0	6.76512
AMT	1.79769e+308	0.0452186	0	0	6.75744
ACAD8	1.79769e+308	0.0453428	0	0	6.75131
DNAJC7	1.79769e+308	0.0453428	0	0	6.75131
CRNKL1	1.79769e+308	0.0454018	0	0	6.74825
FRAT2	1.79769e+308	0.0454018	0	0	6.74825
ARID5A	1.79769e+308	0.0454608	0	0	6.74519
TNPO3	1.79769e+308	0.0454608	0	0	6.74519
SLMAP	1.79769e+308	0.045716	0	0	6.73298
DNAJC2	1.79769e+308	0.0458596	0	0	6.72689
KLK3	1.79769e+308	0.0459906	0	0	6.72081
EEFSEC	1.79769e+308	0.0461091	0	0	6.71475
AATK (NW_001838458 621713..666536)	1.79769e+308	0.0464439	0	0	6.69963
C20orf3	1.79769e+308	0.0464439	0	0	6.69963
MED9	1.79769e+308	0.0464968	0	0	6.69662
THUMPD2	1.79769e+308	0.046622	0	0	6.69059
TRIM15	1.79769e+308	0.046622	0	0	6.69059
MON1A	1.79769e+308	0.0470434	0	0	6.67259
C21orf2	1.79769e+308	0.0472351	0	0	6.66363
DDAH1	1.79769e+308	0.0478309	0	0	6.63836
ECT2L	1.79769e+308	0.0478309	0	0	6.63836
DGCR2	1.79769e+308	0.0478444	0	0	6.63688
FAM19A4	1.79769e+308	0.0478444	0	0	6.63688
ENGASE	1.79769e+308	0.0480436	0	0	6.62801
DUT	1.79769e+308	0.0481035	0	0	6.62506
FAM189A1	1.79769e+308	0.0482032	0	0	6.62064
NOD1	1.79769e+308	0.0482101	0	0	6.61916
RUNDC2A	1.79769e+308	0.0482101	0	0	6.61916
TMEM143	1.79769e+308	0.0482766	0	0	6.61622
C17orf65	1.79769e+308	0.0483432	0	0	6.61328
CCDC17	1.79769e+308	0.0483432	0	0	6.61328
ZNF7	1.79769e+308	0.0484097	0	0	6.61034
PQLC2	1.79769e+308	0.0486963	0	0	6.59862
TH1L	1.79769e+308	0.0488165	0	0	6.59277
PMS2	1.79769e+308	0.0490971	0	0	6.58111
CDKL3	1.79769e+308	0.0492377	0	0	6.57529
ZNF620	1.79769e+308	0.0493918	0	0	6.56948
UQCRB	1.79769e+308	0.0494253	0	0	6.56803
RHBDL3	1.79769e+308	0.0496065	0	0	6.56079
RAD51AP1	1.79769e+308	0.0496669	0	0	6.5579
SLC7A5	1.79769e+308	0.0498552	0	0	6.55069
MXRA8	1.79769e+308	0.0500301	0	0	6.54348
GJB7	1.79769e+308	0.0503875	0	0	6.52913
FAM108C1	1.79769e+308	0.0504481	0	0	6.52626
LOC100132174	1.79769e+308	0.0504481	0	0	6.52626
RABEP2	1.79769e+308	0.0504481	0	0	6.52626
VEZT	1.79769e+308	0.0505225	0	0	6.5234
BOP1	1.79769e+308	0.0505831	0	0	6.52054
WDR12	1.79769e+308	0.0505831	0	0	6.52054
OXGR1	1.79769e+308	0.0508134	0	0	6.51198
RHOBTB1	1.79769e+308	0.0509218	0	0	6.50771
KRT9	1.79769e+308	0.0511588	0	0	6.49776
ARHGEF5	1.79769e+308	0.0515189	0	0	6.48361
DCST1	1.79769e+308	0.0516548	0	0	6.47796
PRSS12	1.79769e+308	0.0517567	0	0	6.47374
SAP18	1.79769e+308	0.0519268	0	0	6.4667
VWA3A	1.79769e+308	0.0519538	0	0	6.4653
COPS7A	1.79769e+308	0.0522134	0	0	6.45548
GRN	1.79769e+308	0.0522134	0	0	6.45548
CCNC	1.79769e+308	0.0523498	0	0	6.44988
CHIT1	1.79769e+308	0.0523498	0	0	6.44988
RGS20	1.79769e+308	0.0523498	0	0	6.44988
WNT5B	1.79769e+308	0.0526514	0	0	6.43872
TGM7	1.79769e+308	0.0527126	0	0	6.43593
PTK2	1.79769e+308	0.0527668	0	0	6.43315
SERPINB7	1.79769e+308	0.0527668	0	0	6.43315
CLDN5	1.79769e+308	0.0529036	0	0	6.42759
FBXO7	1.79769e+308	0.0529036	0	0	6.42759
DET1	1.79769e+308	0.052972	0	0	6.42482
SERPINH1	1.79769e+308	0.0532604	0	0	6.41374
C9orf40	1.79769e+308	0.0536108	0	0	6.39995
UAP1	1.79769e+308	0.0537627	0	0	6.39445
PALLD	1.79769e+308	0.0537832	0	0	6.39353
RNF150	1.79769e+308	0.0540035	0	0	6.38485
ZNF517	1.79769e+308	0.0543354	0	0	6.37254
CLDN14	1.79769e+308	0.0543898	0	0	6.36981
BMX	1.79769e+308	0.054466	0	0	6.36709
PLIN3	1.79769e+308	0.0546878	0	0	6.35892
RGS12	1.79769e+308	0.0547922	0	0	6.3553
ABCB8	1.79769e+308	0.0547988	0	0	6.35485
PHF16	1.79769e+308	0.0550262	0	0	6.34537
UBQLN3	1.79769e+308	0.0550262	0	0	6.34537
PADI6	1.79769e+308	0.0551028	0	0	6.34266
MTMR1	1.79769e+308	0.0552339	0	0	6.33726
HEATR3	1.79769e+308	0.0557268	0	0	6.31842
LOC100653341	1.79769e+308	0.0558582	0	0	6.31306
HCCS	1.79769e+308	0.0559277	0	0	6.31038
PRPSAP1	1.79769e+308	0.0559897	0	0	6.30771
KIAA1199	1.79769e+308	0.0560667	0	0	6.30503
CDK9	1.79769e+308	0.0563055	0	0	6.29703
TCEA2	1.79769e+308	0.0563055	0	0	6.29703
EDC4	1.79769e+308	0.0563403	0	0	6.2957
GCM2	1.79769e+308	0.0564598	0	0	6.2917
ANGPTL5	1.79769e+308	0.0566765	0	0	6.28373
CABYR	1.79769e+308	0.0567463	0	0	6.28108
DTHD1	1.79769e+308	0.0569633	0	0	6.27314
ITPK1	1.79769e+308	0.0569633	0	0	6.27314
JUB	1.79769e+308	0.0570757	0	0	6.26917
JKAMP	1.79769e+308	0.0570955	0	0	6.26785
FANCI	1.79769e+308	0.0571228	0	0	6.26653
LHX3	1.79769e+308	0.0573129	0	0	6.25994
PCBD2	1.79769e+308	0.0573676	0	0	6.25731
ZNF165	1.79769e+308	0.0573676	0	0	6.25731
C16orf7	1.79769e+308	0.0574999	0	0	6.25205
MCF2L2	1.79769e+308	0.0577954	0	0	6.24156
ISLR	1.79769e+308	0.0578579	0	0	6.23894
UGT3A2	1.79769e+308	0.0578579	0	0	6.23894
PARS2	1.79769e+308	0.057928	0	0	6.23633
ABHD6	1.79769e+308	0.0586376	0	0	6.21289
SRRM5	1.79769e+308	0.0588489	0	0	6.20512
PRKAB1	1.79769e+308	0.0590838	0	0	6.19737
EED	1.79769e+308	0.059319	0	0	6.18963
AGXT2	1.79769e+308	0.0593739	0	0	6.18706
FAM203A	1.79769e+308	0.0593739	0	0	6.18706
FAM54B	1.79769e+308	0.0593739	0	0	6.18706
TBL1Y	1.79769e+308	0.0596016	0	0	6.17935
UTS2D	1.79769e+308	0.0596016	0	0	6.17935
SLC26A10	1.79769e+308	0.0596645	0	0	6.17679
TTYH3	1.79769e+308	0.0598217	0	0	6.17166
RXFP1	1.79769e+308	0.0598925	0	0	6.16911
RNPEP	1.79769e+308	0.0599712	0	0	6.16655
PNLIP	2.35748	1.35572e-13	0	126.404	297.995
OTOP1	1.8074	1.4103e-05	0	101.313	183.113
IRGC	-2.54509	3.37672e-07	0	117.611	46.2108
HECA	-2.54509	0.0133175	0	35.3008	13.8701
NCBP1	-2.54509	0.0134969	0	35.1892	13.8263
FAM105A	-2.54509	0.0384163	0	26.8472	10.5486
PLAC8	-2.54509	8.58553e-06	0	92.7293	36.4346
LGALS12	-2.54509	3.33934e-05	0	82.256	32.3195
TAF1A	-2.54509	3.02963e-05	0	83.0133	32.617
BUB1B	-3.18136	0.000200467	0	50.6022	15.9058
PHF10	-3.18136	3.99926e-10	0	125.4	39.4169
DUS3L	-3.18136	2.136e-07	0	89.6135	28.1683
TMEM104	-3.18136	0.00126628	0	39.8722	12.5331
BEST1	-3.18136	7.77852e-05	0	56.0217	17.6093
ADIPOR2	-3.18136	0.000328716	0	47.7562	15.0112
CCDC141	-3.18136	0.0330502	0	20.7397	6.51912
ETFA	-3.18136	3.23343e-11	0	139.744	43.9258
CLOCK	-3.18136	0.00436424	0	32.6302	10.2567
ZNF84	-3.18136	0.0116701	0	26.9082	8.45808
ERGIC2	-3.18136	9.46225e-09	0	107.404	33.7604
GPATCH3	-3.18136	2.40235e-07	0	88.94	27.9566
DCBLD2	-3.18136	0.00571097	0	31.0619	9.7637
C12orf35	-3.81764	5.95973e-09	0	91.1814	23.8842
NCAPG2	-4.24182	2.05278e-05	0	48.157	11.3529
CCDC76	-4.24182	1.24758e-06	0	60.246	14.2029
ZBTB7B	-4.24182	4.0922e-06	0	55.1086	12.9917
SPAG5	-4.24182	1.42634e-05	0	49.7251	11.7226
WDR82	-4.24182	5.23776e-05	0	44.1075	10.3982
MGEA5	-4.24182	0.000274965	0	36.9326	8.70678
APPL1	-4.24182	0.000995532	0	31.2413	7.36506
SNX1	-4.24182	0.00643742	0	22.9853	5.41875
HIST1H2BF	-4.24182	0	0	440.356	103.813
EXOC3	-4.24182	1.17868e-07	0	70.4177	16.6008
NEIL2	-4.24182	1.69352e-07	0	68.8307	16.2267
NEK5	-4.24182	4.07709e-07	0	65.0252	15.3295
TPP1	-4.24182	5.82947e-06	0	53.5956	12.6351
SIPA1	-4.24182	1.0407e-05	0	51.0937	12.0452
SCML4	-4.24182	9.03827e-05	0	41.7446	9.84119
THADA	-4.24182	0.00144619	0	29.5957	6.97712
SF3B14	-4.24182	0	0	245.594	57.8984
ADK	-4.24182	2.21555e-08	0	77.6356	18.3024
SH3GL2	-4.24182	1.48476e-07	0	69.411	16.3635
MPPED1 (NW_001838749 15511..16646)	-5.09018	0	0	333.662	65.5501
RBM18	-5.38385	1.61378e-13	0	678.907	126.101
PABPN1L	-6.36273	0	0	144.655	22.7347
ECEL1	-6.36273	6.40993e-14	0	136.767	21.495
LIPH	-6.36273	1.4127e-10	0	76.5373	12.029
POLR2E	-6.36273	3.2954e-09	0	66.0919	10.3874
ZNF808	-6.36273	4.83125e-08	0	57.1892	8.98815
SNX16	-6.36273	1.00022e-07	0	54.758	8.60606
GFM1	-6.36273	1.04954e-07	0	54.6001	8.58125
PYGM	-6.36273	2.04472e-07	0	52.3654	8.23002
BZW1	-6.36273	2.56126e-07	0	51.609	8.11114
C6orf170	-6.36273	2.16697e-05	0	36.8966	5.79886
ECE1	-6.36273	5.66407e-05	0	33.7048	5.29722
RALGAPA1	-6.36273	0.000988507	0	24.0785	3.7843
PDE4D	-6.36273	0.00808694	0	16.9186	2.65902
SMUG1	-6.36273	4.93773e-15	0	120.607	18.9553
GBAS	-6.36273	1.38433e-13	0	100.773	15.8381
CTH	-6.36273	3.80182e-12	0	88.4828	13.9064
FAM53C	-6.36273	4.45283e-11	0	80.3707	12.6315
LIMK1	-6.36273	3.64295e-08	0	58.1373	9.13717
CDC25B	-6.36273	2.63675e-07	0	51.5107	8.09569
LPL	-6.36273	3.54059e-07	0	50.5346	7.94229
SWT1	-6.36273	7.63097e-07	0	47.9983	7.54367
ZBTB8B	-6.36273	9.98199e-07	0	47.1145	7.40477
HPS1	-6.36273	1.57753e-06	0	45.5943	7.16585
TXNDC16	-6.36273	6.70005e-06	0	40.8001	6.41236
KLF8	-6.36273	3.91145e-05	0	34.9296	5.48972
RET	-6.36273	0.000194487	0	29.5865	4.64996
HBE1	-6.36273	0	0	232.051	36.4703
DRAP1	-6.36273	1.85682e-14	0	188.411	29.6117
PSMC4	-6.36273	4.87562e-14	0	131.954	20.7385
KIN	-6.36273	1.72879e-13	0	99.1378	15.581
GDF5	-6.36273	5.86812e-11	0	79.46	12.4884
ADAMDEC1	-6.36273	1.00537e-10	0	77.6675	12.2066
TRAM2	-6.36273	0.000439915	0	26.8472	4.21945
MAPK7	-6.36273	5.05978e-08	0	57.0341	8.96378
RAB3GAP1	-7.63527	8.14163e-14	0	117.611	15.4036
MCM7	-8.48364	0	0	110.057	12.9729
KIAA1671	-8.48364	6.39782e-06	0	36.1154	4.25707
ALG6	-9.54409	1.4303e-14	0	168.714	17.6773
AKAP6	-10.1804	4.48684e-12	0	72.9193	7.16274
KCNIP3	-12.7255	1.05538e-13	0	125.441	9.85749
CA5A	-12.7255	0	0	174.68	13.7268
LOC100129480	-12.7255	0	0	174.68	13.7268
SIP1	-12.7255	0	0	139.333	10.9491
HSD17B2	-12.7255	5.49248e-14	0	132.046	10.3765
C8orf38	-12.7255	0	0	105.725	8.30814
RARS2	-12.7255	0	0	103.359	8.12221
SLC29A4	-12.7255	4.52091e-12	0	68.5566	5.38736
SALL1	-12.7255	1.72382e-06	0	35.3337	2.77662
RUSC2	-12.7255	4.85722e-06	0	32.6527	2.56594
TREML4	-12.7255	0	0	182.685	14.3559
LOC390595	-12.7255	0	0	136.816	10.7514
TMEM38A	-12.7255	0	0	115.53	9.07863
GNB2	-12.7255	0	0	114	8.95839
PEX16	-12.7255	9.11631e-14	0	99.2418	7.79868
C6orf70	-12.7255	7.3481e-14	0	91.1229	7.16067
TCEB1	-12.7255	5.22172e-14	0	81.2675	6.38622
TASP1	-12.7255	9.59928e-14	0	80.5416	6.32917
DRD5	-12.7255	7.84496e-14	0	79.6941	6.26258
BAG3	-12.7255	6.29275e-13	0	73.6497	5.78759
CHKA	-12.7255	6.67934e-13	0	73.5067	5.77635
RHO	-12.7255	4.77572e-12	0	68.408	5.37568
SLC43A3	-12.7255	8.00466e-12	0	67.099	5.27281
IL2RA	-12.7255	1.90014e-10	0	58.9151	4.62971
SLAMF8	-12.7255	3.4345e-10	0	57.3798	4.50906
RCC2	-12.7255	8.61063e-09	0	49.0553	3.85489
ZNF273	-12.7255	6.49205e-08	0	43.8216	3.44362
WDR20	-12.7255	6.0836e-06	0	32.072	2.52031
TIAM2	-12.7255	8.03389e-06	0	31.3499	2.46356
TRAF6	-12.7255	0.000157876	0	23.6131	1.85558
SGCD	-12.7255	0.00103081	0	18.6647	1.46672
ACSM1	-12.7255	0	0	184.645	14.5099
CYP39A1	-12.7255	0	0	166.684	13.0985
ANKRD60	-12.7255	8.36573e-14	0	157.009	12.3382
NEURL2	-12.7255	1.32913e-13	0	150.4	11.8188
COPS6	-12.7255	0	0	132.786	10.4347
TMEM5	-12.7255	5.49248e-14	0	130.498	10.2549
UBE2L6	-12.7255	3.42262e-14	0	108.636	8.53694
NAT9	-12.7255	0	0	100.988	7.93594
C9orf43	-12.7255	0	0	92.4577	7.26557
SIAH1	-12.7255	8.5907e-14	0	79.2273	6.22589
CGN	-12.7255	4.99279e-13	0	74.1254	5.82497
GPA33	-12.7255	6.19103e-12	0	67.7714	5.32566
DNAJB5	-12.7255	3.43426e-11	0	63.35	4.97821
ZNF140	-12.7255	6.38139e-11	0	61.7389	4.85161
ARMC2	-12.7255	7.20102e-10	0	55.48	4.35977
PDE6B	-12.7255	1.6041e-09	0	53.4142	4.19743
FGB	-12.7255	2.56685e-09	0	52.1922	4.1014
HSDL1	-12.7255	3.17958e-09	0	51.6371	4.05778
ZNF418	-12.7255	3.76655e-09	0	51.2042	4.02376
BDH1	-12.7255	3.92446e-09	0	51.0937	4.01508
CSRP2BP	-12.7255	4.08971e-09	0	50.9837	4.00643
SGK494	-12.7255	5.70048e-09	0	50.12	3.93856
LRRN1	-12.7255	7.14143e-09	0	49.543	3.89322
ARFIP2	-12.7255	8.03533e-09	0	49.2338	3.86892
RIPK4	-12.7255	9.20928e-09	0	48.878	3.84096
ERMN	-12.7255	1.24482e-08	0	48.0958	3.7795
TMEM168	-12.7255	1.33157e-08	0	47.9254	3.76611
DDA1	-12.7255	2.38e-08	0	46.4329	3.64882
CCND1	-12.7255	5.78337e-08	0	44.128	3.4677
ZFYVE1	-12.7255	1.52467e-07	0	41.607	3.26959
FBLN1	-12.7255	2.02229e-07	0	40.8706	3.21172
ATP8B3	-12.7255	8.59232e-07	0	37.1281	2.91762
ZBTB33	-12.7255	1.5237e-06	0	35.653	2.80171
BRD3	-12.7255	2.97514e-06	0	33.9221	2.66569
CCP110	-12.7255	3.04945e-06	0	33.8554	2.66045
PLD1	-12.7255	3.04945e-06	0	33.8554	2.66045
CHST6	-12.7255	3.08371e-05	0	27.8584	2.18918
SLIT1	-12.7255	0.000143056	0	23.8661	1.87546
USP13	-12.7255	0.000143056	0	23.8661	1.87546
ZNF780B	-12.7255	0.000310566	0	21.8552	1.71744
AAAS	-12.7255	0	0	206.155	16.2002
GTF3A	-12.7255	1.85682e-14	0	134.867	10.5982
SDAD1	-12.7255	0	0	125.483	9.86076
LRFN1	-12.7255	0	0	120.915	9.50184
QPCT	-12.7255	9.33202e-14	0	111.188	8.73745
PPAP2A	-12.7255	5.49248e-14	0	106.618	8.37831
SEP15	-12.7255	0	0	102.909	8.08689
DYRK4	-12.7255	1.00721e-13	0	102.631	8.06498
THAP10	-12.7255	2.28276e-14	0	92.5028	7.26912
THNSL2	-12.7255	3.42262e-14	0	92.2325	7.24787
GPR63	-12.7255	1.38433e-13	0	86.148	6.76974
RRNAD1	-12.7255	5.81418e-14	0	83.4523	6.5579
IGF1	-12.7255	9.30788e-13	0	72.6791	5.71132
SLC43A1	-12.7255	1.32199e-12	0	71.7519	5.63845
C5orf64	-12.7255	2.91234e-11	0	63.7768	5.01175
MOBKL2C	-12.7255	2.91234e-11	0	63.7768	5.01175
DCUN1D2	-12.7255	3.45932e-11	0	63.3289	4.97655
CLPB	-12.7255	9.31854e-11	0	60.7681	4.77532
ZNF860	-12.7255	1.79698e-10	0	59.0622	4.64126
TRPV3	-12.7255	7.52151e-10	0	55.3665	4.35084
PMP2	-12.7255	1.80327e-09	0	53.1145	4.17388
PTPRN	-12.7255	1.0959e-08	0	48.428	3.8056
CTNNA2	-12.7255	1.62061e-08	0	47.4213	3.72649
ACOT13	-12.7255	8.64829e-08	0	43.0838	3.38564
ANKRD30B	-12.7255	1.91344e-07	0	41.0122	3.22285
KCNT2	-12.7255	6.145e-06	0	32.0449	2.51817
NRP2	-12.7255	0.000111831	0	24.5118	1.9262
KRTAP6-3	-12.7255	0	0	307.392	24.1557
C9orf6	-12.7255	8.5907e-14	0	99.0341	7.78236
CSTF3	-19.0882	0	0	178.579	9.35547
IRF9	-19.0882	3.108e-14	0	338.534	17.7353
EHBP1L1	-19.0882	8.36573e-14	0	110.993	5.81473
PLAG1	-19.0882	4.87562e-14	0	82.0896	4.30054
TRAF5	-21.2091	0	0	229.742	10.8322
TPM1	-21.2091	0	0	280.44	13.2226
TMEM199	-25.4509	0	0	261.357	10.2691
DHPS	-25.4509	0	0	247.359	9.71906
ATP6V1E2	-25.4509	0	0	191.363	7.51889
CHRNB4	-25.4509	0	0	154.511	6.07094
ADPGK	-25.4509	0	0	147.99	5.81473
TWF1	-25.4509	6.40993e-14	0	138.568	5.44452
EFCAB4B	-25.4509	1.02594e-13	0	111.581	4.38417
PTPN18	-25.4509	0	0	103.218	4.05557
KCND1	-25.4509	0	0	80.2344	3.15252
CYP7A1	-25.4509	2.61543e-13	0	395.172	15.5268
NDST4	-25.4509	9.80469e-14	0	113.419	4.45639
MMP25	-25.4509	8.81707e-14	0	106.558	4.1868
PTX4	-25.4509	0	0	266.32	10.4641
RBPMS2	-25.4509	0	0	194.308	7.63462
C9orf128	-25.4509	0	0	128.549	5.05088
TRIM2	-25.4509	4.56992e-14	0	109.595	4.30614
PPM1E	-25.4509	1.6225e-11	0	57.862	2.27347
DSG4	-25.4509	2.28276e-14	0	102.325	4.0205
TPH1	-38.1764	3.83691e-13	0	312.981	8.19828
NENF	-38.1764	0	0	2149.03	56.2921
C7orf23	-38.1764	6.67934e-13	0	1089.28	28.5329
GAB1	-38.1764	4.56992e-14	0	71.8154	1.88115
PFDN4	-38.1764	0	0	844.071	22.1098
IGFALS	-38.1764	0	0	258.209	6.76358
CNTD2	-44.5391	5.81418e-14	0	729.484	16.3785
CD200R1L	-50.9018	0	0	554.881	10.901
ERLIN2	-50.9018	0	0	123.538	2.42699
ARID3B	-63.6273	0	0	223.241	3.50858
TLK2	-63.6273	0	0	174.294	2.7393
UGDH	-89.0782	1.49787e-13	0	414.988	4.6587
NKAIN1	-89.0782	2.47412e-13	0	524.11	5.8837
SEC61B	-127.255	0	0	3369.28	26.4767
FAM132B	-165.431	4.56992e-14	0	1103.36	6.6696
VEGFA	-165.431	1.95916e-13	0	672.199	4.06332
FBXO3	-190.882	0	0	1016.21	5.32375
EMCN	-248.146	0	0	1829.27	7.37175
MUT	-254.509	5.62449e-13	0	974.541	3.8291
ZNF845	-279.96	0	0	966.312	3.45161
ATP1B3	-407.215	0	0	3271.76	8.03449
SLC30A8	-763.527	0	0	1942.75	2.54444
ANXA3	-1.79769e+308	3.42262e-14	0	117.029	0
AARS2	-1.79769e+308	5.66642e-09	0	39.465	0
ABLIM3	-1.79769e+308	7.1741e-10	0	43.6801	0
ACSM4	-1.79769e+308	8.5907e-14	0	108.636	0
ACTL6A	-1.79769e+308	3.62859e-13	0	596.075	0
ADAP1	-1.79769e+308	5.49248e-14	0	91.6965	0
ADNP2	-1.79769e+308	4.76692e-08	0	35.137	0
ALKBH7	-1.79769e+308	4.87562e-14	0	711.32	0
ALPL	-1.79769e+308	3.42262e-14	0	72.9404	0
ANKRD18A	-1.79769e+308	0	0	1823.63	0
ANXA9	-1.79769e+308	0	0	103.812	0
ARHGAP10	-1.79769e+308	9.80469e-14	0	61.9409	0
ARHGAP22	-1.79769e+308	1.27341e-13	0	68.9059	0
ARL4A	-1.79769e+308	2.44529e-12	0	55.2211	0
ATP11C	-1.79769e+308	3.108e-14	0	64.8248	0
AUP1	-1.79769e+308	1.00721e-13	0	118.124	0
B3GAT1	-1.79769e+308	1.32779e-11	0	51.7925	0
B3GAT2	-1.79769e+308	0	0	196.731	0
BAIAP2L1	-1.79769e+308	1.46564e-11	0	51.5949	0
BMF	-1.79769e+308	5.02152e-09	0	39.7134	0
BRCC3	-1.79769e+308	0	0	72.4659	0
C10orf12	-1.79769e+308	1.93985e-09	0	41.6619	0
C11orf61	-1.79769e+308	8.5907e-14	0	85.0644	0
C11orf84	-1.79769e+308	7.57196e-14	0	96.5596	0
C12orf70	-1.79769e+308	0	0	148.863	0
C15orf2	-1.79769e+308	1.40498e-05	0	23.5368	0
C15orf57	-1.79769e+308	7.03403e-14	0	110.604	0
C19orf50	-1.79769e+308	0	0	116.382	0
C19orf70	-1.79769e+308	0	0	1683.14	0
C1orf109	-1.79769e+308	3.42262e-14	0	80.4048	0
C1orf55	-1.79769e+308	1.25085e-10	0	47.2321	0
C1QL2	-1.79769e+308	0	0	100.827	0
C1QTNF3	-1.79769e+308	4.10196e-11	0	49.5041	0
C20orf72	-1.79769e+308	0	0	88.8983	0
C20orf94	-1.79769e+308	0	0	134.579	0
C22orf31	-1.79769e+308	0	0	176.966	0
C22orf39	-1.79769e+308	0	0	67.966	0
C3orf26	-1.79769e+308	0	0	145.769	0
C4orf48	-1.79769e+308	3.50065e-13	0	350.654	0
C6orf195	-1.79769e+308	0	0	91.475	0
C6orf52	-1.79769e+308	2.588e-13	0	304.917	0
C8orf42	-1.79769e+308	8.14163e-14	0	100.773	0
C8orf82	-1.79769e+308	0	0	196.018	0
CALR3	-1.79769e+308	0	0	2505.06	0
CAPN12	-1.79769e+308	2.33573e-13	0	60.5156	0
CCDC107	-1.79769e+308	0	0	1505.19	0
CCDC137	-1.79769e+308	0	0	89.7834	0
CCDC39	-1.79769e+308	4.92896e-11	0	49.1316	0
CCDC40	-1.79769e+308	5.85242e-10	0	44.0972	0
CCDC9	-1.79769e+308	1.02594e-13	0	90.9478	0
CCL13	-1.79769e+308	0	0	222.507	0
CCT6B	-1.79769e+308	0	0	99.7646	0
CD177	-1.79769e+308	0	0	80.0987	0
CDK10	-1.79769e+308	0	0	105.313	0
CDK11A	-1.79769e+308	4.87562e-14	0	72.2998	0
CES4A	-1.79769e+308	0	0	72.1896	0
CHST9	-1.79769e+308	9.80469e-14	0	84.3069	0
CIRBP	-1.79769e+308	0	0	135.543	0
CLCN6	-1.79769e+308	1.06381e-07	0	33.4901	0
CLDN2	-1.79769e+308	2.44529e-12	0	55.2211	0
CLRN1	-1.79769e+308	4.6437e-13	0	58.8236	0
CNTNAP4	-1.79769e+308	9.74458e-09	0	38.3617	0
COLEC12	-1.79769e+308	1.4303e-14	0	64.9805	0
COX19	-1.79769e+308	8.1655e-09	0	38.7226	0
CRABP1	-1.79769e+308	0	0	245.276	0
CRISP1	-1.79769e+308	1.00721e-13	0	95.7781	0
CRYAA	-1.79769e+308	0	0	169.976	0
DBH	-1.79769e+308	3.42262e-14	0	68.6063	0
DCTPP1	-1.79769e+308	0	0	169.065	0
DDX11	-1.79769e+308	4.21318e-14	0	96.4366	0
DHX16	-1.79769e+308	3.12582e-12	0	54.7106	0
DLX4	-1.79769e+308	0	0	81.5826	0
DNAJC30	-1.79769e+308	0	0	224.175	0
EIF2AK4	-1.79769e+308	6.08019e-14	0	68.7058	0
EIF5A2	-1.79769e+308	7.61489e-08	0	34.1731	0
ELMOD3	-1.79769e+308	1.47078e-13	0	61.1804	0
ELOVL1	-1.79769e+308	1.07758e-13	0	127.683	0
ERI2	-1.79769e+308	0	0	90.0182	0
FAM135B	-1.79769e+308	1.74038e-06	0	27.7929	0
FAM153A (NW_001840515 1783..8756)	-1.79769e+308	6.66208e-13	0	908.169	0
FAM83B	-1.79769e+308	3.0986e-13	0	59.7895	0
FBF1	-1.79769e+308	0	0	147.09	0
FBXO22	-1.79769e+308	9.739e-15	0	308.178	0
FCGR2B	-1.79769e+308	5.17884e-13	0	262.869	0
FFAR2	-1.79769e+308	6.72808e-14	0	92.2325	0
FLJ43860 (NW_001839140 2693172..2727226)	-1.79769e+308	0	0	197.655	0
FUBP3	-1.79769e+308	1.98467e-13	0	60.1503	0
GABBR1	-1.79769e+308	1.92091e-08	0	36.9831	0
GCET2	-1.79769e+308	1.2216e-12	0	56.6587	0
GFAP	-1.79769e+308	1.44619e-10	0	46.9393	0
GLMN	-1.79769e+308	2.28276e-14	0	93.1857	0
GMPR	-1.79769e+308	0	0	249.971	0
GNAZ	-1.79769e+308	2.97719e-13	0	59.884	0
GOLIM4	-1.79769e+308	0	0	66.7207	0
GP6	-1.79769e+308	1.12988e-13	0	83.4891	0
GPR39	-1.79769e+308	0	0	67.1228	0
GRHPR	-1.79769e+308	0	0	766.613	0
GSDMD	-1.79769e+308	1.4303e-14	0	79.8622	0
GTF2E1	-1.79769e+308	1.07758e-13	0	62.4516	0
GTPBP6 (NW_001839458 2610..5572)	-1.79769e+308	0	0	255.538	0
GYS1	-1.79769e+308	1.014e-11	0	52.3365	0
HHATL	-1.79769e+308	3.108e-14	0	101.53	0
HIF3A	-1.79769e+308	6.26991e-07	0	29.8617	0
HIST2H2BF	-1.79769e+308	1.55655e-13	0	464.101	0
HMMR	-1.79769e+308	2.15008e-13	0	60.2844	0
HOXC8	-1.79769e+308	0	0	165.23	0
HS3ST3A1	-1.79769e+308	0	0	149.864	0
HYDIN (NW_001838300 174..3787)	-1.79769e+308	3.39514e-13	0	520.201	0
ICOSLG	-1.79769e+308	4.93619e-13	0	58.7689	0
IFT20	-1.79769e+308	0	0	388.816	0
IGFBP6	-1.79769e+308	0	0	588.054	0
IL26	-1.79769e+308	0	0	180.853	0
INSM1	-1.79769e+308	0	0	77.6356	0
IQCF3	-1.79769e+308	0	0	145.544	0
ITIH4	-1.79769e+308	7.66332e-13	0	57.6769	0
KCNMB3	-1.79769e+308	4.1454e-12	0	54.1474	0
KHK	-1.79769e+308	5.49248e-14	0	74.2562	0
KIAA1274	-1.79769e+308	2.14961e-09	0	41.4521	0
KIR2DL3	-1.79769e+308	1.32913e-13	0	118.642	0
KLF2	-1.79769e+308	4.19936e-13	0	277.644	0
LEPRE1	-1.79769e+308	7.57196e-14	0	70.0012	0
LIPC	-1.79769e+308	0	0	118.051	0
LIPJ	-1.79769e+308	0	0	127.597	0
[truncated: 128 more rows]
