# Supplementary material for: Characterization of Dendritic Cell-Derived Extracellular Vesicles During Dengue Virus Infection
Source: Front Microbiol. 2018 Aug 6;9:1792. doi: 10.3389/fmicb.2018.01792 (PMC6090163; doi:10.3389/fmicb.2018.01792)
Supplement: Supplementary file 4 [file Table_4.XLSX]

## Sheet: Plan1
Enriched in DENV3 5532 EVs
Diseases or Functions Annotation	p-Value	z-score	# Genes
antimicrobial response	0.0479	3.628	38
cell movement of leukocytes	0.0424	2.972	47
leukocyte migration	0.0456	2.926	50
homologous recombination of cells	0.0419	2.53	11
recombination of cells	0.0326	2.53	12
chemotaxis of granulocytes	0.0161	2.43	19
stimulation of leukocytes	0.00511	2.343	12
DNA recombination	0.0117	2.335	20
Recombination	0.0145	2.335	21
immune response of T lymphocytes	0.000554	2.303	7
cell movement of mononuclear leukocytes	0.0106	2.26	37
cell movement of monocytes	0.0291	2.216	19
response of lymphocytes	0.00027	2.201	10
response of mononuclear leukocytes	0.0121	2.058	11
Transcription	0.0418	2.056	213
cytostasis of carcinoma cell lines	0.0464	1.981	4
stimulation of lymphocytes	0.00811	1.915	10
adhesion of mononuclear leukocytes	0.0213	1.867	15
adhesion of T lymphocytes	0.0121	1.854	11
cell-mediated response of T lymphocytes	0.000958	1.841	5
migration of mononuclear leukocytes	0.0472	1.79	26
maturation of leukocytes	0.0485	1.738	10
apoptosis of liver cells	0.0196	1.671	6
adhesion of lymphocytes	0.00437	1.589	14
binding of STAT binding site	0.0374	1.579	5
migration of monocytes	0.0485	1.492	10
T cell response	0.00128	1.451	7
differentiation of myeloid leukemia cells	0.0181	1.446	5
shape change of granulocytes	0.00986	1.231	5
activation of dendritic cells	0.0397	1.226	8
cell viability of hematopoietic progenitor cells	0.0329	1.219	7
binding of interferon-gamma activated sequence	0.0464	1.217	4
maturation of blood cells	0.0205	1.134	13
immune response of leukocytes	0.0123	1.127	16
accumulation of cells	0.0442	1.044	12
apoptosis of acute myeloblastic leukemia cells	0.0135	1	4
binding of plasma membrane	0.0236	1	5
chemokinesis of cells	0.027	0.849	4
destabilization of microtubules	0.0135	0.728	4
quantity of embryonic cell lines	0.0196	0.686	4
homologous recombination repair of DNA	0.03	0.655	5
differentiation of tumor cells	0.0103	0.61	7
cell movement of breast cell lines	0.0396	0.404	14
cell proliferation of fibroblasts	0.0452	0.39	17
chemotaxis of B lymphocytes	0.00244	0.312	6
migration of breast cell lines	0.0419	0.194	11
sister chromatid exchange of cells	0.027	0.152	4
Enriched in DENV3 290 EVs
Diseases or Functions Annotation	p-Value	z-score	# Molecules
migration of microvascular endothelial cells	0.00628	-1.706	7
proliferation of eye cell lines	0.0464	-1.172	4
hydrolysis of phosphatidylcholine	0.036	-1	4
differentiation of osteoclasts	0.0154	-0.943	8
quantity of apoptotic cells	0.0464	-0.849	4
proliferation of mammary tumor cells	0.0236	-0.785	5
invasion of tissue	0.00893	-0.658	11
immune response of antigen presenting cells	0.0426	-0.655	6
proliferation of activated T lymphocytes	0.0155	-0.6	6
invasion of endothelial cells	0.0374	-0.533	5
infection of T lymphocytes	0.0458	-0.283	5
adhesion of breast cell lines	0.0464	-0.277	4
invasion of pancreatic cancer cell lines	0.0256	-0.173	8
